# Supplementary material for: Immunoinformatics Analysis of SARS-CoV-2 ORF1ab Polyproteins to Identify Promiscuous and Highly Conserved T-Cell Epitopes to Formulate Vaccine for Indonesia and the World Population
Source: MDPI journal article supplement (doi:10.3390/vaccines9121459), 2021-12-09
Supplement: s1 [file s1]

**Table S1.** Conservancy of predicted CTL epitopes among the SARS-CoV-2 variants. Row 1 contain information about the name of the variants according to the WHO, the pangolin lineage of the variants, and the number of retrieved sequences in the bracket. The duplicated sequences were removed prior to the analysis and the percentage of the conservation was calculated based on the number of the unique sequences only, in which the proportion was shown in the bracket.

| Start | Epitope<br>sequence | Alpha<br>B.1.1.7<br>(158) | Beta<br>B.1.351<br>(374) | Delta<br>B.1.617.2<br>(1157) | Eta<br>B.1.525<br>(436) | Gamma<br>P.1<br>(9) | Iota<br>B.1.526<br>(24) | Kappa<br>B.1.617.1<br>(148) | Lambda<br>C.7<br>(286) | Mu<br>B.1.621<br>(18) |
|-------|---------------------|---------------------------|--------------------------|------------------------------|-------------------------|---------------------|-------------------------|-----------------------------|------------------------|-----------------------|
| 295   | FMGRIRSVY           | 100.00%<br>(111/111)      | 99.32%<br>(145/146)      | 98.69%<br>(452/458)          | 100.00%<br>(174/174)    | 100.00%<br>(8/8)    | 100.00%<br>(19/19)      | 100.00%<br>(95/95)          | 100.00%<br>(113/113)   | 100.00%<br>(17/17)    |
| 541   | RVVRSIFSR           | 100.00%<br>(111/111)      | 100.00%<br>(146/146)     | 99.56%<br>(456/458)          | 100.00%<br>(174/174)    | 100.00%<br>(8/8)    | 100.00%<br>(19/19)      | 100.00%<br>(95/95)          | 100.00%<br>(113/113)   | 100.00%<br>(17/17)    |
| 611   | WLTNIFGTV           | 100.00%<br>(111/111)      | 100.00%<br>(146/146)     | 99.78%<br>(457/458)          | 100.00%<br>(174/174)    | 100.00%<br>(8/8)    | 100.00%<br>(19/19)      | 100.00%<br>(95/95)          | 100.00%<br>(113/113)   | 100.00%<br>(17/17)    |
| 806   | MVTNNTFTL           | 100.00%<br>(111/111)      | 100.00%<br>(146/146)     | 100.00%<br>(458/458)         | 100.00%<br>(174/174)    | 100.00%<br>(8/8)    | 100.00%<br>(19/19)      | 100.00%<br>(95/95)          | 100.00%<br>(113/113)   | 100.00%<br>(17/17)    |
| 899   | WSMATYYLF           | 100.00%<br>(111/111)      | 97.95%<br>(143/146)      | 99.56%<br>(456/458)          | 100.00%<br>(174/174)    | 100.00%<br>(8/8)    | 94.74%<br>(18/19)       | 100.00%<br>(95/95)          | 100.00%<br>(113/113)   | 100.00%<br>(17/17)    |
| 1055  | VVVNAANVY           | 100.00%<br>(111/111)      | 99.32%<br>(145/146)      | 99.13%<br>(454/458)          | 99.43%<br>(173/174)     | 100.00%<br>(8/8)    | 100.00%<br>(19/19)      | 100.00%<br>(95/95)          | 99.12%<br>(112/113)    | 100.00%<br>(17/17)    |
| 1140  | HEVLLAPLL           | 100.00%<br>(111/111)      | 100.00%<br>(146/146)     | 100.00%<br>(458/458)         | 100.00%<br>(174/174)    | 100.00%<br>(8/8)    | 100.00%<br>(19/19)      | 100.00%<br>(95/95)          | 100.00%<br>(113/113)   | 100.00%<br>(17/17)    |
| 1247  | FLTENLLLY           | 100.00%<br>(111/111)      | 100.00%<br>(146/146)     | 98.69%<br>(452/458)          | 100.00%<br>(174/174)    | 100.00%<br>(8/8)    | 100.00%<br>(19/19)      | 98.95%<br>(94/95)           | 100.00%<br>(113/113)   | 100.00%<br>(17/17)    |
| 1254  | LYIDINGNL           | 100.00%<br>(111/111)      | 100.00%<br>(146/146)     | 99.78%<br>(457/458)          | 100.00%<br>(174/174)    | 100.00%<br>(8/8)    | 100.00%<br>(19/19)      | 100.00%<br>(95/95)          | 100.00%<br>(113/113)   | 100.00%<br>(17/17)    |
| 1269  | LVSDIDITF           | 100.00%<br>(111/111)      | 100.00%<br>(146/146)     | 99.34%<br>(455/458)          | 100.00%<br>(174/174)    | 100.00%<br>(8/8)    | 100.00%<br>(19/19)      | 100.00%<br>(95/95)          | 95.58%<br>(108/113)    | 100.00%<br>(17/17)    |
| 1366  | ILGTVSWNL           | 100.00%<br>(111/111)      | 100.00%<br>(146/146)     | 100.00%<br>(458/458)         | 100.00%<br>(174/174)    | 100.00%<br>(8/8)    | 100.00%<br>(19/19)      | 100.00%<br>(95/95)          | 100.00%<br>(113/113)   | 100.00%<br>(17/17)    |
| 1674  | YLATALLTL           | 99.10%<br>(110/111)       | 100.00%<br>(146/146)     | 99.34%<br>(455/458)          | 100.00%<br>(174/174)    | 100.00%<br>(8/8)    | 100.00%<br>(19/19)      | 100.00%<br>(95/95)          | 98.23%<br>(111/113)    | 100.00%<br>(17/17)    |
| 2175  | LLQLCTFTR           | 100.00%<br>(111/111)      | 99.32%<br>(145/146)      | 99.78%<br>(457/458)          | 99.43%<br>(173/174)     | 100.00%<br>(8/8)    | 100.00%<br>(19/19)      | 100.00%<br>(95/95)          | 97.35%<br>(110/113)    | 100.00%<br>(17/17)    |
| 2327  | FLAYILFTR           | 98.20%<br>(109/111)       | 100.00%<br>(146/146)     | 100.00%<br>(458/458)         | 100.00%<br>(174/174)    | 100.00%<br>(8/8)    | 100.00%<br>(19/19)      | 100.00%<br>(95/95)          | 100.00%<br>(113/113)   | 100.00%<br>(17/17)    |
| 2331  | ILFTRFFYV           | 98.20%<br>(109/111)       | 100.00%<br>(146/146)     | 100.00%<br>(458/458)         | 100.00%<br>(174/174)    | 100.00%<br>(8/8)    | 100.00%<br>(19/19)      | 100.00%<br>(95/95)          | 100.00%<br>(113/113)   | 100.00%<br>(17/17)    |
| 2350  | FSYFAVHFI           | 100.00%<br>(111/111)      | 100.00%<br>(146/146)     | 99.34%<br>(455/458)          | 100.00%<br>(174/174)    | 100.00%<br>(8/8)    | 100.00%<br>(19/19)      | 100.00%<br>(95/95)          | 100.00%<br>(113/113)   | 100.00%<br>(17/17)    |
| 2597  | FSSTFNVPM           | 100.00%<br>(111/111)      | 100.00%<br>(146/146)     | 99.56%<br>(456/458)          | 99.43%<br>(173/174)     | 100.00%<br>(8/8)    | 100.00%<br>(19/19)      | 100.00%<br>(95/95)          | 99.12%<br>(112/113)    | 100.00%<br>(17/17)    |
| 2629  | LSTFISAAR           | 100.00%<br>(111/111)      | 100.00%<br>(146/146)     | 100.00%<br>(458/458)         | 100.00%<br>(174/174)    | 100.00%<br>(8/8)    | 100.00%<br>(19/19)      | 100.00%<br>(95/95)          | 100.00%<br>(113/113)   | 100.00%<br>(17/17)    |
| 2784  | AIFYLITPV           | 100.00%<br>(111/111)      | 100.00%<br>(146/146)     | 99.78%<br>(457/458)          | 100.00%<br>(174/174)    | 87.50%<br>(7/8)     | 100.00%<br>(19/19)      | 100.00%<br>(95/95)          | 100.00%<br>(113/113)   | 100.00%<br>(17/17)    |
| 2786  | FYLITPVHV           | 100.00%<br>(111/111)      | 100.00%<br>(146/146)     | 99.78%<br>(457/458)          | 100.00%<br>(174/174)    | 100.00%<br>(8/8)    | 100.00%<br>(19/19)      | 100.00%<br>(95/95)          | 100.00%<br>(113/113)   | 100.00%<br>(17/17)    |
| 2787  | YLITPVHVM           | 100.00%<br>(111/111)      | 100.00%<br>(146/146)     | 99.78%<br>(457/458)          | 100.00%<br>(174/174)    | 100.00%<br>(8/8)    | 100.00%<br>(19/19)      | 100.00%<br>(95/95)          | 100.00%<br>(113/113)   | 100.00%<br>(17/17)    |
| 2883  | FLPRVFSAV           | 100.00%<br>(111/111)      | 97.95%<br>(143/146)      | 100.00%<br>(458/458)         | 100.00%<br>(174/174)    | 100.00%<br>(8/8)    | 100.00%<br>(19/19)      | 98.95%<br>(94/95)           | 99.12%<br>(112/113)    | 100.00%<br>(17/17)    |
| 3059  | LAYYFMRFR           | 100.00%<br>(111/111)      | 100.00%<br>(146/146)     | 99.56%<br>(456/458)          | 100.00%<br>(174/174)    | 100.00%<br>(8/8)    | 100.00%<br>(19/19)      | 100.00%<br>(95/95)          | 100.00%<br>(113/113)   | 94.12%<br>(16/17)     |

|      |           |                      |                      |                      |                      |                  |                    |                    |                      |                    |
|------|-----------|----------------------|----------------------|----------------------|----------------------|------------------|--------------------|--------------------|----------------------|--------------------|
| 3060 | AYYFMRFR  | 100.00%<br>(111/111) | 100.00%<br>(146/146) | 99.56%<br>(456/458)  | 100.00%<br>(174/174) | 100.00%<br>(8/8) | 100.00%<br>(19/19) | 100.00%<br>(95/95) | 100.00%<br>(113/113) | 94.12%<br>(16/17)  |
| 3076 | VVAFNTLLF | 100.00%<br>(111/111) | 100.00%<br>(146/146) | 100.00%<br>(458/458) | 100.00%<br>(174/174) | 100.00%<br>(8/8) | 100.00%<br>(19/19) | 100.00%<br>(95/95) | 100.00%<br>(113/113) | 100.00%<br>(17/17) |
| 3121 | FLAHIQWMV | 100.00%<br>(111/111) | 100.00%<br>(146/146) | 99.78%<br>(457/458)  | 100.00%<br>(174/174) | 100.00%<br>(8/8) | 100.00%<br>(19/19) | 100.00%<br>(95/95) | 100.00%<br>(113/113) | 100.00%<br>(17/17) |
| 3137 | FWITIAYII | 100.00%<br>(111/111) | 98.63%<br>(144/146)  | 9.61%<br>(44/458)    | 99.43%<br>(173/174)  | 100.00%<br>(8/8) | 100.00%<br>(19/19) | 98.95%<br>(94/95)  | 100.00%<br>(113/113) | 100.00%<br>(17/17) |
| 3152 | FYWFFSNYL | 99.10%<br>(110/111)  | 100.00%<br>(146/146) | 100.00%<br>(458/458) | 100.00%<br>(174/174) | 100.00%<br>(8/8) | 100.00%<br>(19/19) | 100.00%<br>(95/95) | 100.00%<br>(113/113) | 100.00%<br>(17/17) |
| 3466 | VLAWLYAAV | 100.00%<br>(111/111) | 100.00%<br>(146/146) | 100.00%<br>(458/458) | 100.00%<br>(174/174) | 100.00%<br>(8/8) | 100.00%<br>(19/19) | 100.00%<br>(95/95) | 100.00%<br>(113/113) | 100.00%<br>(17/17) |
| 3481 | FLNRFTTTL | 100.00%<br>(111/111) | 100.00%<br>(146/146) | 99.78%<br>(457/458)  | 100.00%<br>(174/174) | 100.00%<br>(8/8) | 100.00%<br>(19/19) | 100.00%<br>(95/95) | 100.00%<br>(113/113) | 100.00%<br>(17/17) |
| 3582 | LLLILTSL  | 100.00%<br>(111/111) | 100.00%<br>(146/146) | 100.00%<br>(458/458) | 100.00%<br>(174/174) | 100.00%<br>(8/8) | 100.00%<br>(19/19) | 100.00%<br>(95/95) | 100.00%<br>(113/113) | 100.00%<br>(17/17) |
| 3605 | LYENAFLPF | 99.10%<br>(110/111)  | 95.89%<br>(140/146)  | 98.03%<br>(449/458)  | 97.13%<br>(169/174)  | 100.00%<br>(8/8) | 100.00%<br>(19/19) | 90.53%<br>(86/95)  | 94.69%<br>(107/113)  | 94.12%<br>(16/17)  |
| 3652 | VYMPASWVM | 100.00%<br>(111/111) | 99.32%<br>(145/146)  | 99.78%<br>(457/458)  | 100.00%<br>(174/174) | 100.00%<br>(8/8) | 100.00%<br>(19/19) | 100.00%<br>(95/95) | 99.12%<br>(112/113)  | 100.00%<br>(17/17) |
| 3684 | YASAVVLLI | 100.00%<br>(111/111) | 100.00%<br>(146/146) | 100.00%<br>(458/458) | 100.00%<br>(174/174) | 100.00%<br>(8/8) | 100.00%<br>(19/19) | 100.00%<br>(95/95) | 99.12%<br>(112/113)  | 100.00%<br>(17/17) |
| 3692 | ILMTARTVY | 100.00%<br>(111/111) | 100.00%<br>(146/146) | 99.34%<br>(455/458)  | 100.00%<br>(174/174) | 100.00%<br>(8/8) | 100.00%<br>(19/19) | 100.00%<br>(95/95) | 100.00%<br>(113/113) | 100.00%<br>(17/17) |
| 3752 | FLARGIVFM | 100.00%<br>(111/111) | 99.32%<br>(145/146)  | 100.00%<br>(458/458) | 100.00%<br>(174/174) | 100.00%<br>(8/8) | 100.00%<br>(19/19) | 98.95%<br>(94/95)  | 100.00%<br>(113/113) | 100.00%<br>(17/17) |
| 4030 | TMLFTMLRK | 100.00%<br>(111/111) | 100.00%<br>(146/146) | 100.00%<br>(458/458) | 100.00%<br>(174/174) | 100.00%<br>(8/8) | 100.00%<br>(19/19) | 100.00%<br>(95/95) | 100.00%<br>(113/113) | 100.00%<br>(17/17) |
| 4265 | VLSFCAFAV | 100.00%<br>(111/111) | 100.00%<br>(146/146) | 99.78%<br>(457/458)  | 100.00%<br>(174/174) | 100.00%<br>(8/8) | 100.00%<br>(19/19) | 100.00%<br>(95/95) | 100.00%<br>(113/113) | 100.00%<br>(17/17) |
| 4513 | YTMADLVYA | 100.00%<br>(111/111) | 100.00%<br>(146/146) | 100.00%<br>(458/458) | 99.43%<br>(173/174)  | 100.00%<br>(8/8) | 94.74%<br>(18/19)  | 100.00%<br>(95/95) | 100.00%<br>(113/113) | 100.00%<br>(17/17) |
| 4656 | YIKWDLK   | 100.00%<br>(111/111) | 100.00%<br>(146/146) | 100.00%<br>(458/458) | 100.00%<br>(174/174) | 100.00%<br>(8/8) | 100.00%<br>(19/19) | 100.00%<br>(95/95) | 100.00%<br>(113/113) | 100.00%<br>(17/17) |
| 4698 | ILHCANFNV | 100.00%<br>(111/111) | 100.00%<br>(146/146) | 100.00%<br>(458/458) | 100.00%<br>(174/174) | 100.00%<br>(8/8) | 100.00%<br>(19/19) | 100.00%<br>(95/95) | 100.00%<br>(113/113) | 100.00%<br>(17/17) |
| 4723 | KIFVDGVPF | 100.00%<br>(111/111) | 100.00%<br>(146/146) | 100.00%<br>(458/458) | 100.00%<br>(174/174) | 100.00%<br>(8/8) | 100.00%<br>(19/19) | 100.00%<br>(95/95) | 100.00%<br>(113/113) | 100.00%<br>(17/17) |
| 4846 | YYRYNLPTM | 100.00%<br>(111/111) | 98.63%<br>(144/146)  | 100.00%<br>(458/458) | 100.00%<br>(174/174) | 100.00%<br>(8/8) | 100.00%<br>(19/19) | 100.00%<br>(95/95) | 100.00%<br>(113/113) | 100.00%<br>(17/17) |
| 4862 | FVVEVVDKY | 100.00%<br>(111/111) | 100.00%<br>(146/146) | 100.00%<br>(458/458) | 100.00%<br>(174/174) | 100.00%<br>(8/8) | 100.00%<br>(19/19) | 87.37%<br>(83/95)  | 100.00%<br>(113/113) | 100.00%<br>(17/17) |
| 5024 | MASLVLARK | 100.00%<br>(111/111) | 100.00%<br>(146/146) | 100.00%<br>(458/458) | 100.00%<br>(174/174) | 100.00%<br>(8/8) | 100.00%<br>(19/19) | 100.00%<br>(95/95) | 100.00%<br>(113/113) | 100.00%<br>(17/17) |
| 5132 | FVNEFYAYL | 99.10%<br>(110/111)  | 100.00%<br>(146/146) | 100.00%<br>(458/458) | 100.00%<br>(174/174) | 100.00%<br>(8/8) | 100.00%<br>(19/19) | 100.00%<br>(95/95) | 100.00%<br>(113/113) | 100.00%<br>(17/17) |
| 5245 | LMIERFVSL | 100.00%<br>(111/111) | 100.00%<br>(146/146) | 100.00%<br>(458/458) | 100.00%<br>(174/174) | 100.00%<br>(8/8) | 100.00%<br>(19/19) | 100.00%<br>(95/95) | 100.00%<br>(113/113) | 100.00%<br>(17/17) |
| 5247 | IERFVSLAI | 100.00%<br>(111/111) | 100.00%<br>(146/146) | 100.00%<br>(458/458) | 100.00%<br>(174/174) | 100.00%<br>(8/8) | 100.00%<br>(19/19) | 100.00%<br>(95/95) | 100.00%<br>(113/113) | 100.00%<br>(17/17) |
| 5250 | FVSLAIDAY | 100.00%<br>(111/111) | 100.00%<br>(146/146) | 100.00%<br>(458/458) | 100.00%<br>(174/174) | 100.00%<br>(8/8) | 100.00%<br>(19/19) | 100.00%<br>(95/95) | 100.00%<br>(113/113) | 100.00%<br>(17/17) |
| 5273 | HLYLQYIRK | 100.00%<br>(111/111) | 100.00%<br>(146/146) | 100.00%<br>(458/458) | 100.00%<br>(174/174) | 100.00%<br>(8/8) | 100.00%<br>(19/19) | 100.00%<br>(95/95) | 100.00%<br>(113/113) | 100.00%<br>(17/17) |

|      |           |                      |                      |                      |                      |                  |                    |                    |                      |                    |
|------|-----------|----------------------|----------------------|----------------------|----------------------|------------------|--------------------|--------------------|----------------------|--------------------|
| 5614 | FAIGLALYY | 100.00%<br>(111/111) | 100.00%<br>(146/146) | 99.34%<br>(455/458)  | 99.43%<br>(173/174)  | 100.00%<br>(8/8) | 100.00%<br>(19/19) | 100.00%<br>(95/95) | 100.00%<br>(113/113) | 100.00%<br>(17/17) |
| 5678 | YVFCTVNAL | 100.00%<br>(111/111) | 100.00%<br>(146/146) | 99.13%<br>(454/458)  | 100.00%<br>(174/174) | 100.00%<br>(8/8) | 100.00%<br>(19/19) | 100.00%<br>(95/95) | 100.00%<br>(113/113) | 100.00%<br>(17/17) |
| 6070 | FKHLIPLMY | 100.00%<br>(111/111) | 100.00%<br>(146/146) | 99.13%<br>(454/458)  | 100.00%<br>(174/174) | 100.00%<br>(8/8) | 100.00%<br>(19/19) | 100.00%<br>(95/95) | 100.00%<br>(113/113) | 100.00%<br>(17/17) |
| 6108 | VLWAHGFEL | 100.00%<br>(111/111) | 100.00%<br>(146/146) | 100.00%<br>(458/458) | 98.85%<br>(172/174)  | 100.00%<br>(8/8) | 100.00%<br>(19/19) | 100.00%<br>(95/95) | 100.00%<br>(113/113) | 100.00%<br>(17/17) |
| 6506 | FELWAKRNI | 100.00%<br>(111/111) | 100.00%<br>(146/146) | 100.00%<br>(458/458) | 100.00%<br>(174/174) | 100.00%<br>(8/8) | 100.00%<br>(19/19) | 100.00%<br>(95/95) | 100.00%<br>(113/113) | 100.00%<br>(17/17) |
| 6585 | FRNARNGVL | 100.00%<br>(111/111) | 100.00%<br>(146/146) | 100.00%<br>(458/458) | 100.00%<br>(174/174) | 100.00%<br>(8/8) | 100.00%<br>(19/19) | 100.00%<br>(95/95) | 100.00%<br>(113/113) | 100.00%<br>(17/17) |
| 6700 | HLLIGLAKR | 100.00%<br>(111/111) | 100.00%<br>(146/146) | 99.78%<br>(457/458)  | 100.00%<br>(174/174) | 100.00%<br>(8/8) | 100.00%<br>(19/19) | 100.00%<br>(95/95) | 100.00%<br>(113/113) | 100.00%<br>(17/17) |
| 6714 | FELEDFIPM | 98.20%<br>(109/111)  | 100.00%<br>(146/146) | 99.34%<br>(455/458)  | 100.00%<br>(174/174) | 100.00%<br>(8/8) | 100.00%<br>(19/19) | 100.00%<br>(95/95) | 100.00%<br>(113/113) | 100.00%<br>(17/17) |
| 6748 | LLDDFVEI  | 100.00%<br>(111/111) | 100.00%<br>(146/146) | 100.00%<br>(458/458) | 100.00%<br>(174/174) | 100.00%<br>(8/8) | 100.00%<br>(19/19) | 100.00%<br>(95/95) | 100.00%<br>(113/113) | 100.00%<br>(17/17) |
| 6848 | CQYLNTLTL | 100.00%<br>(111/111) | 100.00%<br>(146/146) | 100.00%<br>(458/458) | 100.00%<br>(174/174) | 100.00%<br>(8/8) | 100.00%<br>(19/19) | 100.00%<br>(95/95) | 100.00%<br>(113/113) | 100.00%<br>(17/17) |
| 6850 | YLNTLTLAV | 100.00%<br>(111/111) | 100.00%<br>(146/146) | 100.00%<br>(458/458) | 100.00%<br>(174/174) | 100.00%<br>(8/8) | 100.00%<br>(19/19) | 100.00%<br>(95/95) | 100.00%<br>(113/113) | 100.00%<br>(17/17) |
| 6885 | WLPTGTLLV | 100.00%<br>(111/111) | 100.00%<br>(146/146) | 100.00%<br>(458/458) | 98.28%<br>(171/174)  | 100.00%<br>(8/8) | 100.00%<br>(19/19) | 97.89%<br>(93/95)  | 100.00%<br>(113/113) | 100.00%<br>(17/17) |
| 6978 | YKLMGHFAW | 100.00%<br>(111/111) | 100.00%<br>(146/146) | 100.00%<br>(458/458) | 100.00%<br>(174/174) | 100.00%<br>(8/8) | 100.00%<br>(19/19) | 100.00%<br>(95/95) | 100.00%<br>(113/113) | 100.00%<br>(17/17) |
| 7019 | YVMHANYIF | 100.00%<br>(111/111) | 100.00%<br>(146/146) | 100.00%<br>(458/458) | 100.00%<br>(174/174) | 100.00%<br>(8/8) | 100.00%<br>(19/19) | 100.00%<br>(95/95) | 100.00%<br>(113/113) | 100.00%<br>(17/17) |
| 7026 | IFWRNTNPI | 100.00%<br>(111/111) | 100.00%<br>(146/146) | 100.00%<br>(458/458) | 99.43%<br>(173/174)  | 100.00%<br>(8/8) | 100.00%<br>(19/19) | 100.00%<br>(95/95) | 100.00%<br>(113/113) | 100.00%<br>(17/17) |

**Table S2.** Conservancy of predicted HTL epitopes among the SARS-CoV-2 variants. Row 1 contain information about the name of the variants according to the WHO, the pangolin lineage of the variants, and the number of retrieved sequences in the bracket. The duplicated sequences were removed prior to the analysis and the percentage of the conservation was calculated based on the number of the unique sequences only, in which the proportion was shown in the bracket.

| Start | Epitope sequence | Alpha<br>B.1.1.7<br>(158) | Beta<br>B.1.351<br>(374) | Delta<br>B.1.617.2<br>(1157) | Eta<br>B.1.525<br>(436) | Gamma<br>P.1<br>(9) | Iota<br>B.1.526<br>(24) | Kappa<br>B.1.617.1<br>(148) | Lambda<br>C.7<br>(286) | Mu<br>B.1.621<br>(18) |
|-------|------------------|---------------------------|--------------------------|------------------------------|-------------------------|---------------------|-------------------------|-----------------------------|------------------------|-----------------------|
| 447   | NDNLEILQKEKVNI   | 99.10%<br>(110/111)       | 100.00%<br>(146/146)     | 100.00%<br>(458/458)         | 100.00%<br>(174/174)    | 100.00%<br>(8/8)    | 100.00%<br>(19/19)      | 100.00%<br>(95/95)          | 99.12%<br>(112/113)    | 100.00%<br>(17/17)    |
| 448   | DNLLEILQKEKVNIN  | 99.10%<br>(110/111)       | 100.00%<br>(146/146)     | 100.00%<br>(458/458)         | 100.00%<br>(174/174)    | 100.00%<br>(8/8)    | 100.00%<br>(19/19)      | 100.00%<br>(95/95)          | 99.12%<br>(112/113)    | 100.00%<br>(17/17)    |
| 554   | TAQNSVRVLQKAAIT  | 100.00%<br>(111/111)      | 99.32%<br>(145/146)      | 98.91%<br>(453/458)          | 95.98%<br>(167/174)     | 100.00%<br>(8/8)    | 100.00%<br>(19/19)      | 98.95%<br>(94/95)           | 100.00%<br>(113/113)   | 100.00%<br>(17/17)    |
| 736   | PKEIIFLEGETLPTE  | 100.00%<br>(111/111)      | 100.00%<br>(146/146)     | 99.56%<br>(456/458)          | 100.00%<br>(174/174)    | 100.00%<br>(8/8)    | 100.00%<br>(19/19)      | 100.00%<br>(95/95)          | 100.00%<br>(113/113)   | 100.00%<br>(17/17)    |
| 1054  | PTVVVNAANVYLKHG  | 99.10%<br>(110/111)       | 99.32%<br>(145/146)      | 98.69%<br>(452/458)          | 98.85%<br>(172/174)     | 100.00%<br>(8/8)    | 100.00%<br>(19/19)      | 100.00%<br>(95/95)          | 98.23%<br>(111/113)    | 0.00%<br>(0/17)       |
| 1187  | VSSFLEMKSEKQVEQ  | 100.00%<br>(111/111)      | 98.63%<br>(144/146)      | 99.78%<br>(457/458)          | 100.00%<br>(174/174)    | 0.00%<br>(0/8)      | 100.00%<br>(19/19)      | 100.00%<br>(95/95)          | 99.12%<br>(112/113)    | 100.00%<br>(17/17)    |
| 1211  | VKPFITESKPSVEQR  | 94.59%<br>(105/111)       | 100.00%<br>(146/146)     | 98.91%<br>(453/458)          | 100.00%<br>(174/174)    | 87.50%<br>(7/8)     | 100.00%<br>(19/19)      | 100.00%<br>(95/95)          | 100.00%<br>(113/113)   | 100.00%<br>(17/17)    |
| 1349  | CKSAFYILPSIISNE  | 100.00%<br>(111/111)      | 100.00%<br>(146/146)     | 99.56%<br>(456/458)          | 98.85%<br>(172/174)     | 100.00%<br>(8/8)    | 100.00%<br>(19/19)      | 100.00%<br>(95/95)          | 99.12%<br>(112/113)    | 100.00%<br>(17/17)    |
| 1350  | KSAFYILPSIISNEK  | 100.00%<br>(111/111)      | 100.00%<br>(146/146)     | 99.56%<br>(456/458)          | 98.85%<br>(172/174)     | 100.00%<br>(8/8)    | 100.00%<br>(19/19)      | 100.00%<br>(95/95)          | 99.12%<br>(112/113)    | 100.00%<br>(17/17)    |
| 1355  | ILPSIISNEKQEILG  | 100.00%<br>(111/111)      | 100.00%<br>(146/146)     | 100.00%<br>(458/458)         | 99.43%<br>(173/174)     | 100.00%<br>(8/8)    | 100.00%<br>(19/19)      | 100.00%<br>(95/95)          | 100.00%<br>(113/113)   | 100.00%<br>(17/17)    |
| 1356  | LPSIISNEKQEILGT  | 100.00%<br>(111/111)      | 100.00%<br>(146/146)     | 100.00%<br>(458/458)         | 99.43%<br>(173/174)     | 100.00%<br>(8/8)    | 100.00%<br>(19/19)      | 100.00%<br>(95/95)          | 100.00%<br>(113/113)   | 100.00%<br>(17/17)    |
| 1357  | PSIISNEKQEILGTV  | 100.00%<br>(111/111)      | 100.00%<br>(146/146)     | 100.00%<br>(458/458)         | 99.43%<br>(173/174)     | 100.00%<br>(8/8)    | 100.00%<br>(19/19)      | 100.00%<br>(95/95)          | 100.00%<br>(113/113)   | 100.00%<br>(17/17)    |
| 2944  | AYESLRPDTRYVLMD  | 100.00%<br>(111/111)      | 99.32%<br>(145/146)      | 99.78%<br>(457/458)          | 100.00%<br>(174/174)    | 87.50%<br>(7/8)     | 100.00%<br>(19/19)      | 100.00%<br>(95/95)          | 100.00%<br>(113/113)   | 94.12%<br>(16/17)     |
| 2945  | YESLRPDTRYVLM DG | 100.00%<br>(111/111)      | 100.00%<br>(146/146)     | 99.78%<br>(457/458)          | 100.00%<br>(174/174)    | 87.50%<br>(7/8)     | 100.00%<br>(19/19)      | 100.00%<br>(95/95)          | 100.00%<br>(113/113)   | 88.24%<br>(15/17)     |
| 2958  | DGSHIQFPNTYLEGS  | 100.00%<br>(111/111)      | 98.63%<br>(144/146)      | 99.13%<br>(454/458)          | 100.00%<br>(174/174)    | 100.00%<br>(8/8)    | 100.00%<br>(19/19)      | 100.00%<br>(95/95)          | 99.12%<br>(112/113)    | 94.12%<br>(16/17)     |
| 3815  | VSTQEFYRMNSQG LL | 97.30%<br>(108/111)       | 96.58%<br>(141/146)      | 99.13%<br>(454/458)          | 98.85%<br>(172/174)     | 100.00%<br>(8/8)    | 100.00%<br>(19/19)      | 97.89%<br>(93/95)           | 99.12%<br>(112/113)    | 100.00%<br>(17/17)    |
| 3944  | IASEFSSLPSYA AFA | 100.00%<br>(111/111)      | 95.89%<br>(140/146)      | 99.78%<br>(457/458)          | 100.00%<br>(174/174)    | 100.00%<br>(8/8)    | 100.00%<br>(19/19)      | 98.95%<br>(94/95)           | 100.00%<br>(113/113)   | 100.00%<br>(17/17)    |
| 3945  | ASEFSSLPSYAA FAT | 99.10%<br>(110/111)       | 95.89%<br>(140/146)      | 99.78%<br>(457/458)          | 100.00%<br>(174/174)    | 100.00%<br>(8/8)    | 100.00%<br>(19/19)      | 100.00%<br>(95/95)          | 100.00%<br>(113/113)   | 100.00%<br>(17/17)    |
| 3951  | LPSYAAFATAQEAYE  | 99.10%<br>(110/111)       | 94.52%<br>(138/146)      | 99.56%<br>(456/458)          | 98.85%<br>(172/174)     | 100.00%<br>(8/8)    | 100.00%<br>(19/19)      | 100.00%<br>(95/95)          | 100.00%<br>(113/113)   | 100.00%<br>(17/17)    |
| 4457  | LIDSYFVVKRHTFSN  | 100.00%<br>(111/111)      | 99.32%<br>(145/146)      | 100.00%<br>(458/458)         | 100.00%<br>(174/174)    | 100.00%<br>(8/8)    | 100.00%<br>(19/19)      | 100.00%<br>(95/95)          | 100.00%<br>(113/113)   | 100.00%<br>(17/17)    |
| 4458  | IDSYFVVKRHTFSNY  | 100.00%<br>(111/111)      | 99.32%<br>(145/146)      | 100.00%<br>(458/458)         | 100.00%<br>(174/174)    | 100.00%<br>(8/8)    | 100.00%<br>(19/19)      | 100.00%<br>(95/95)          | 100.00%<br>(113/113)   | 100.00%<br>(17/17)    |
| 4560  | NPDILRVYANLGERV  | 100.00%<br>(111/111)      | 100.00%<br>(146/146)     | 95.63%<br>(438/458)          | 100.00%<br>(174/174)    | 100.00%<br>(8/8)    | 100.00%<br>(19/19)      | 100.00%<br>(95/95)          | 100.00%<br>(113/113)   | 100.00%<br>(17/17)    |
| 4561  | PDILRVYANLGERVR  | 100.00%<br>(111/111)      | 100.00%<br>(146/146)     | 95.63%<br>(438/458)          | 100.00%<br>(174/174)    | 100.00%<br>(8/8)    | 100.00%<br>(19/19)      | 100.00%<br>(95/95)          | 100.00%<br>(113/113)   | 100.00%<br>(17/17)    |

|      |                 |                      |                      |                      |                      |                  |                    |                    |                      |                    |
|------|-----------------|----------------------|----------------------|----------------------|----------------------|------------------|--------------------|--------------------|----------------------|--------------------|
| 4761 | KELLYAADPAMHAA  | 99.10%<br>(110/111)  | 100.00%<br>(146/146) | 99.78%<br>(457/458)  | 100.00%<br>(174/174) | 100.00%<br>(8/8) | 100.00%<br>(19/19) | 100.00%<br>(95/95) | 100.00%<br>(113/113) | 100.00%<br>(17/17) |
| 4830 | KHFFFAQDGNAAISD | 100.00%<br>(111/111) | 100.00%<br>(146/146) | 99.78%<br>(457/458)  | 99.43%<br>(173/174)  | 100.00%<br>(8/8) | 100.00%<br>(19/19) | 100.00%<br>(95/95) | 100.00%<br>(113/113) | 94.12%<br>(16/17)  |
| 4933 | QMNLKYAISAKNRAR | 100.00%<br>(111/111) | 100.00%<br>(146/146) | 99.78%<br>(457/458)  | 100.00%<br>(174/174) | 100.00%<br>(8/8) | 100.00%<br>(19/19) | 100.00%<br>(95/95) | 100.00%<br>(113/113) | 100.00%<br>(17/17) |
| 4934 | MNLKYAISAKNRART | 100.00%<br>(111/111) | 100.00%<br>(146/146) | 99.78%<br>(457/458)  | 100.00%<br>(174/174) | 100.00%<br>(8/8) | 100.00%<br>(19/19) | 100.00%<br>(95/95) | 100.00%<br>(113/113) | 100.00%<br>(17/17) |
| 4935 | NLKYAISAKNRARTV | 100.00%<br>(111/111) | 100.00%<br>(146/146) | 99.78%<br>(457/458)  | 100.00%<br>(174/174) | 100.00%<br>(8/8) | 100.00%<br>(19/19) | 100.00%<br>(95/95) | 100.00%<br>(113/113) | 100.00%<br>(17/17) |
| 5019 | PNMLRIMASLVLARK | 100.00%<br>(111/111) | 100.00%<br>(146/146) | 100.00%<br>(458/458) | 100.00%<br>(174/174) | 100.00%<br>(8/8) | 100.00%<br>(19/19) | 100.00%<br>(95/95) | 100.00%<br>(113/113) | 88.24%<br>(15/17)  |
| 5717 | AKHYVYIGDPAQLPA | 100.00%<br>(111/111) | 100.00%<br>(146/146) | 100.00%<br>(458/458) | 99.43%<br>(173/174)  | 100.00%<br>(8/8) | 100.00%<br>(19/19) | 100.00%<br>(95/95) | 100.00%<br>(113/113) | 100.00%<br>(17/17) |
| 5775 | TVSALVYDNKLKAHK | 82.88%<br>(92/111)   | 100.00%<br>(146/146) | 100.00%<br>(458/458) | 100.00%<br>(174/174) | 100.00%<br>(8/8) | 100.00%<br>(19/19) | 100.00%<br>(95/95) | 100.00%<br>(113/113) | 100.00%<br>(17/17) |
| 5776 | VSALVYDNKLKAHKD | 82.88%<br>(92/111)   | 100.00%<br>(146/146) | 100.00%<br>(458/458) | 100.00%<br>(174/174) | 100.00%<br>(8/8) | 100.00%<br>(19/19) | 100.00%<br>(95/95) | 100.00%<br>(113/113) | 100.00%<br>(17/17) |
| 5777 | SALVYDNKLKAHKDK | 82.88%<br>(92/111)   | 100.00%<br>(146/146) | 100.00%<br>(458/458) | 100.00%<br>(174/174) | 100.00%<br>(8/8) | 100.00%<br>(19/19) | 100.00%<br>(95/95) | 100.00%<br>(113/113) | 100.00%<br>(17/17) |
| 5834 | VFISPYNSQNAVASK | 100.00%<br>(111/111) | 100.00%<br>(146/146) | 99.78%<br>(457/458)  | 99.43%<br>(173/174)  | 100.00%<br>(8/8) | 100.00%<br>(19/19) | 100.00%<br>(95/95) | 100.00%<br>(113/113) | 100.00%<br>(17/17) |
| 6046 | PTGYVDTPNNTDFSR | 100.00%<br>(111/111) | 100.00%<br>(146/146) | 100.00%<br>(458/458) | 100.00%<br>(174/174) | 100.00%<br>(8/8) | 100.00%<br>(19/19) | 100.00%<br>(95/95) | 100.00%<br>(113/113) | 94.12%<br>(16/17)  |
| 6454 | LENVAFNVVNKGHFD | 100.00%<br>(111/111) | 99.32%<br>(145/146)  | 100.00%<br>(458/458) | 100.00%<br>(174/174) | 100.00%<br>(8/8) | 100.00%<br>(19/19) | 100.00%<br>(95/95) | 100.00%<br>(113/113) | 100.00%<br>(17/17) |
| 6726 | TVKNYFITDAQTGSS | 99.10%<br>(110/111)  | 100.00%<br>(146/146) | 99.34%<br>(455/458)  | 100.00%<br>(174/174) | 100.00%<br>(8/8) | 94.74%<br>(18/19)  | 100.00%<br>(95/95) | 100.00%<br>(113/113) | 100.00%<br>(17/17) |
| 7075 | KGRLIIRENNRVVIS | 100.00%<br>(111/111) | 100.00%<br>(146/146) | 100.00%<br>(458/458) | 100.00%<br>(174/174) | 100.00%<br>(8/8) | 100.00%<br>(19/19) | 100.00%<br>(95/95) | 100.00%<br>(113/113) | 100.00%<br>(17/17) |
| 7076 | GRLIIRENNRVVISS | 100.00%<br>(111/111) | 100.00%<br>(146/146) | 100.00%<br>(458/458) | 100.00%<br>(174/174) | 100.00%<br>(8/8) | 100.00%<br>(19/19) | 100.00%<br>(95/95) | 100.00%<br>(113/113) | 100.00%<br>(17/17) |
| 7077 | RLIIRENNRVVISSD | 100.00%<br>(111/111) | 100.00%<br>(146/146) | 100.00%<br>(458/458) | 100.00%<br>(174/174) | 100.00%<br>(8/8) | 100.00%<br>(19/19) | 100.00%<br>(95/95) | 100.00%<br>(113/113) | 100.00%<br>(17/17) |

**Table S3.** Five out of 7 SARS-CoV-2 peptides that match with the human peptides were reported in IEDB as experimentally confirmed by T-cell assay. However, 4 peptides were recognized by T-cells from healthy individuals who have not infected by SARS-CoV-2. This table showing the comparison of the degree of homology of SARS-CoV-2 peptides versus peptides from human proteomes and versus peptides from human common cold coronaviruses (229E, HKU, NL63, and OC43). For homology with HCC, only homology of > 60% was considered.

| SARS-CoV-2 Epitope             | Immunization                                                                                     | Assay Antigen | MHC Restriction | Assay Description                              | Homology with human peptides (%) | Homology with human common cold coronavirus (%)                                                |
|--------------------------------|--------------------------------------------------------------------------------------------------|---------------|-----------------|------------------------------------------------|----------------------------------|------------------------------------------------------------------------------------------------|
| 2784 AIFYLITPV <sup>2792</sup> | Infectious disease via exposure to SARS-CoV2 (Source Organism)                                   | AIFYLITPV     | HLA-A*02:01     | biological activity activation Positive        | <u>AIFYLITLV</u> (77.8 %)        | n.a.                                                                                           |
| 5614 FAIGLALYY <sup>5622</sup> | Infectious disease via exposure to SARS-CoV2 (Source Organism)                                   | FAIGLALYY     | HLA-C*07:02     | multimer/tetramer qualitative binding Positive | SYIGLALYY (77.8%)                | HKU <u>LAIGLAVYY</u> (77.8%)                                                                   |
|                                | Exposure to endemic/ubiquitous agent Coronavirus (Taxonomic Parent) without evidence for disease | FAIGLALYY     | HLA-C*07:02     | multimer/tetramer qualitative binding Positive |                                  | NL63 <u>CSIGLGLYY</u> (66.7%)<br>OC43 <u>LAIGLAVFY</u> (66.7%)                                 |
| 3684 YASAVVLLI <sup>3692</sup> | Exposure to endemic/ubiquitous agent Coronavirus (Taxonomic Parent) without evidence for disease | YASAVVLLI     | HLA-C*06:02     | multimer/tetramer qualitative binding Positive | <u>VASAVVLLG</u> (77.8%)         | 229E <u>YESAVVNGI</u> (66.7%)                                                                  |
| 6748 LLLDDFVEI <sup>6756</sup> | Exposure to endemic/ubiquitous agent Coronavirus (Taxonomic Parent) without evidence for disease | LLLDDFVEI     | HLA-A*02:01     | ELISPOT IFN $\gamma$ release Positive-High     | <u>IALDDFVEI</u> (77.8%)         | 229E <u>LLLDDFVSV</u> (77.8%)<br>HKU <u>LLLDDFVSI</u> (88.9%)<br>NL63 <u>LLLDDFVTI</u> (88.9%) |
|                                | Infectious disease via exposure to SARS-CoV2 (Source Organism)                                   | LLLDDFVEI     | HLA-A*02:01     | ELISPOT IFN $\gamma$ release Positive-High     |                                  | OC43 <u>ILLDDFVAL</u> (66.7%)                                                                  |
| 3752 FLARGIVFM <sup>3760</sup> | Infectious disease via exposure to SARS-CoV2 (Source Organism)                                   | FLARGIVFM     | HLA-A*02:01     | multimer/tetramer qualitative binding Positive | XCARGIVFM (77.8%)                | HKU <u>FLQSGIVKM</u> (66.7%)                                                                   |
|                                | Exposure to endemic/ubiquitous agent Coronavirus (Taxonomic Parent) without evidence for disease | FLARGIVFM     | HLA-A*02:01     | multimer/tetramer qualitative binding Positive |                                  | OC43 <u>FLQSGIVKM</u> (66.7%)                                                                  |

**Table S4.** SARS-CoV-2 peptides that do not have homology match with the human peptides were reported in IEDB as experimentally confirmed by T-cell assay. Majority of these peptides were recognized by T-cells from individuals who were infected by SARS-CoV-2.

| Epitope                       | Immunization                                                                                     | Assay Antigen | MHC Restriction | Assay Description                                  | Homology with human common cold coronavirus (%)                                                |
|-------------------------------|--------------------------------------------------------------------------------------------------|---------------|-----------------|----------------------------------------------------|------------------------------------------------------------------------------------------------|
| 5678YVFCTVNAL <sup>5686</sup> | No immunization was performed                                                                    | YVFCTVNAL     | HLA class I     | biological activity activation Positive            | 229E <u>YVFSTVNAL</u> (88.9%)                                                                  |
|                               | Infectious disease via exposure to SARS-CoV2 (Source Organism)                                   | YVFCTVNAL     | HLA class I     | biological activity activation Positive            | HKU <u>YVFTTNAL</u> (77.8%)<br>NL63 <u>YFSTVNAL</u> (77.8%)<br>OC43 <u>YVFTTNAL</u> (77.8%)    |
|                               | No immunization was performed                                                                    | LMIERFVSL     | HLA class I     | biological activity activation Positive            |                                                                                                |
|                               | Exposure to endemic/ubiquitous agent Coronavirus (Taxonomic Parent) without evidence for disease | LMIERFVSL     | HLA-A*02:01     | multimer/tetramer qualitative binding Positive     | HKU <u>LLIERFVSL</u> (88.9%)<br>OC43 <u>LLIERFVSL</u> (88.9%)                                  |
| 2787YLITPVHVM <sup>2795</sup> | Exposure to endemic/ubiquitous agent Coronavirus (Taxonomic Parent) without evidence for disease | YLITPVHVM     | HLA-C*07:01     | multimer/tetramer qualitative binding Positive     |                                                                                                |
|                               | Exposure to endemic/ubiquitous agent Coronavirus (Taxonomic Parent) without evidence for disease | YLITPVHVM     | HLA-A*02:01     | multimer/tetramer qualitative binding Positive     | n.a.                                                                                           |
|                               | Infectious disease via exposure to SARS-CoV2 (Source Organism)                                   | YLITPVHVM     | HLA-B*15:01     | multimer/tetramer qualitative binding Positive     |                                                                                                |
|                               | Infectious disease via exposure to SARS-CoV2 (Source Organism)                                   | YLITPVHVM     | HLA-A*02:01     | biological activity activation Positive            |                                                                                                |
|                               | Infectious disease via exposure to SARS-CoV2 (Source Organism)                                   | LVSDIDITF     | HLA-B*35:01     | biological activity activation Positive            | n.a.                                                                                           |
| 1269LVSDIDITF <sup>1277</sup> | Infectious disease via exposure to SARS-CoV2 (Source Organism)                                   | YVMHANYIF     | HLA-A*32:01     | biological activity activation Positive            | HKU <u>NVMHANYLF</u> (77.8%)<br>NL63 <u>NTVHANYIF</u> (66.7%)<br>OC43 <u>NVMHANYLF</u> (77.8%) |
| 7019YVMHANYIF <sup>7027</sup> | Infectious disease via exposure to SARS-CoV2 (Source Organism)                                   | ILMTARTVY     | HLA-B*15:01     | multimer/tetramer qualitative binding Positive-Low |                                                                                                |
| 3692ILMTARTVY <sup>3700</sup> | Infectious disease via exposure to SARS-CoV2 (Source Organism)                                   | ILMTARTVY     | HLA-B*15:01     | multimer/tetramer qualitative binding Positive     | n.a.                                                                                           |
| 1055VVVNAANVY <sup>1063</sup> | No immunization was performed                                                                    | ILMTARTVY     | HLA-B*15:01     | multimer/tetramer qualitative binding Positive     |                                                                                                |
|                               | Infectious disease via exposure to SARS-CoV2 (Source Organism)                                   | VVVNAANVY     | HLA-B*35:01     | biological activity activation Positive            | NL63 <u>FVVNAANEN</u> (66.7%)<br>OC43 <u>VVVNPANGH</u> (66.7%)                                 |

|                               |                                                                                                  |           |             |                                                |                                                               |
|-------------------------------|--------------------------------------------------------------------------------------------------|-----------|-------------|------------------------------------------------|---------------------------------------------------------------|
| 5024MASLVLARK <sup>5032</sup> | Infectious disease via exposure to SARS-CoV2 (Source Organism)                                   | MASLVLARK | HLA-A*68:01 | biological activity activation Positive        | HKU <u>VSSLVLARK</u> (77.8%)<br>OC43 <u>VSSLVLARK</u> (77.8%) |
| 5132FVNEFYAYL <sup>5140</sup> | Exposure to endemic/ubiquitous agent Coronavirus (Taxonomic Parent) without evidence for disease | FVNEFYAYL | HLA-A*02:01 | multimer/tetramer qualitative binding positive | 229E <u>FVDDFYGYL</u> (44.4%)<br>HKU <u>FVNEYEFL</u> (66.7%)  |
| 4862FVVEVVDKY <sup>4870</sup> | Infectious disease via exposure to SARS-CoV2 (Source Organism)                                   | FVVEVVDKY | HLA-B*15:01 | multimer/tetramer qualitative binding positive | HKU <u>FVLEVVKY</u> (77.8%)<br>OC43 <u>FVLEVVKY</u> (77.8%)   |
| 2331ILFTRFFYV <sup>2339</sup> | Infectious disease via exposure to SARS-CoV2 (Source Organism)                                   | ILFTRFFYV | HLA-A*02:01 | biological activity activation Positive        | n.a.                                                          |
|                               | Infectious disease via exposure to SARS-CoV2 (Source Organism)                                   | ILFTRFFYV | HLA-A*02:01 | ICS IFN $\gamma$ release Positive-Low          |                                                               |
|                               | Infectious disease via exposure to SARS-CoV2 (Source Organism)                                   | ILFTRFFYV | HLA-A*02:01 | ICS IFN $\gamma$ release Positive-Low          |                                                               |
| 3481FLNRFTTTL <sup>3489</sup> | No immunization was performed                                                                    | FLNRFTTTL | HLA class I | biological activity activation Positive        | n.a.                                                          |
|                               | Infectious disease via exposure to SARS-CoV2 (Source Organism)                                   | FLNRFTTTL | HLA class I | biological activity activation Positive        |                                                               |
|                               | Infectious disease via exposure to SARS-CoV2 (Source Organism)                                   | FLNRFTTTL | HLA class I | biological activity activation Positive        |                                                               |
| 1674YLATALLTL <sup>1682</sup> | Infectious disease via exposure to SARS-CoV2 (Source Organism)                                   | YLATALLTL | HLA-A*02:01 | biological activity activation Positive        | n.a.                                                          |
|                               | Infectious disease via exposure to SARS-CoV2 (Source Organism)                                   | YLATALLTL | HLA-A*02:01 | ELISPOT IFN $\gamma$ release Positive-High     |                                                               |
|                               | Exposure to endemic/ubiquitous agent Coronavirus (Taxonomic Parent) without evidence for disease | YLATALLTL | HLA-A*02:01 | ELISPOT IFN $\gamma$ release Positive-High     |                                                               |
|                               | Infectious disease via exposure to SARS-CoV2 (Source Organism)                                   | YLATALLTL | HLA-A*02:01 | multimer/tetramer qualitative binding positive |                                                               |
|                               | Exposure to endemic/ubiquitous agent Coronavirus (Taxonomic Parent) without evidence for disease | YLATALLTL | HLA-A*02:01 | multimer/tetramer qualitative binding positive |                                                               |
| 2883FLPRVFS <sup>2891</sup>   | Infectious disease via exposure to SARS-CoV2 (Source Organism)                                   | FLPRVFS   | HLA class I | biological activity activation Positive        | OC43 <u>FLRVFSQV</u> (66.7%)                                  |



|                               |                                                                                                  |           |             |                                                |                                                                 |
|-------------------------------|--------------------------------------------------------------------------------------------------|-----------|-------------|------------------------------------------------|-----------------------------------------------------------------|
|                               | Documented exposure to SARS-CoV2 (Source Organism) without evidence for disease                  | FLPRVFSAV | HLA class I | biological activity activation Positive        |                                                                 |
|                               | Infectious disease via exposure to SARS-CoV2 (Source Organism)                                   | FLPRVFSAV | HLA-A*02:01 | biological activity activation Positive        |                                                                 |
|                               | No immunization was performed                                                                    | FLPRVFSAV | HLA class I | biological activity activation Positive        |                                                                 |
|                               | Infectious disease via exposure to SARS-CoV2 (Source Organism)                                   | FLPRVFSAV | HLA class I | biological activity activation Positive        |                                                                 |
|                               | Exposure to endemic/ubiquitous agent Coronavirus (Taxonomic Parent) without evidence for disease | FLPRVFSAV | HLA-A*02:01 | multimer/tetramer qualitative binding positive |                                                                 |
| 3466VLAWLYAAV <sup>3474</sup> | No immunization was performed                                                                    | VLAWLYAAV | HLA class I | biological activity activation Positive        | 229E <u>VVAFLYAAI</u> (66.7%)<br>HKU <u>VIAWLYAAI</u> (77.8%)   |
|                               | Infectious disease via exposure to SARS-CoV2 (Source Organism)                                   | VLAWLYAAV | HLA class I | biological activity activation Positive        | NL63 <u>VVAFLYAAL</u> (66.7%)<br>OC43 <u>FVAWLYAAI</u> (66.7%)  |
|                               |                                                                                                  |           |             |                                                |                                                                 |
|                               |                                                                                                  |           |             |                                                |                                                                 |
| 4698ILHCANFNV <sup>4707</sup> | Infectious disease via exposure to SARS-CoV2 (Source Organism)                                   | ILHCANFNV | HLA class I | biological activity activation Positive        | 229E <u>ILHCSNFNT</u> (77.8%)<br>HKU <u>IILHCANFNI</u> (77.8%)  |
|                               | No immunization was performed                                                                    | ILHCANFNV | HLA class I | biological activity activation Positive        | NL63 <u>VIHCANFNT</u> (77.8%)<br>OC43 <u>IILHCANFNI</u> (77.8%) |
|                               |                                                                                                  |           |             |                                                |                                                                 |
|                               |                                                                                                  |           |             |                                                |                                                                 |
| 6850YLNTLTLAV <sup>6858</sup> | No immunization was performed                                                                    | YLNTLTLAV | HLA class I | biological activity activation Positive        | HKU <u>YLNTTTLAV</u> (88.9%)                                    |
|                               | Infectious disease via exposure to SARS-CoV2 (Source Organism)                                   | YLNTLTLAV | HLA class I | biological activity activation Positive        | OC43 <u>YLNTTTLAV</u> (88.9%)                                   |
|                               |                                                                                                  |           |             |                                                |                                                                 |
|                               |                                                                                                  |           |             |                                                |                                                                 |
| 3121FLAHIQWMV <sup>3129</sup> | Infectious disease via exposure to SARS-CoV2 (Source Organism)                                   | FLAHIQWMV | HLA-A*02:06 | biological activity activation Positive        |                                                                 |
|                               | Infectious disease via exposure to SARS-CoV2 (Source Organism)                                   | FLAHIQWMV | HLA-A*02:01 | multimer/tetramer qualitative binding positive | n.a.                                                            |
|                               | Exposure to endemic/ubiquitous agent Coronavirus (Taxonomic Parent) without evidence for disease | FLAHIQWMV | HLA-A*02:01 | multimer/tetramer qualitative binding positive |                                                                 |
|                               |                                                                                                  |           |             |                                                |                                                                 |
| 2786FYLITPVHV <sup>2794</sup> | Exposure to endemic/ubiquitous agent Coronavirus (Taxonomic Parent) without evidence for disease | FYLITPVHV | HLA-C*07:02 | multimer/tetramer qualitative binding positive | n.a.                                                            |
|                               |                                                                                                  |           |             |                                                |                                                                 |
| 6108VLWAHGFEL <sup>6116</sup> | Infectious disease via exposure to SARS-                                                         | VLWAHGFEL | HLA class I | biological activity activation Positive        | 229E <u>VLWAGGLEL</u> (77.8%)                                   |

|                    |                                                                |            |             |                                                |                                                               |
|--------------------|----------------------------------------------------------------|------------|-------------|------------------------------------------------|---------------------------------------------------------------|
|                    | CoV2 (Source Organism)                                         |            |             |                                                | NL63 <u>VLWAGSLEL</u> (66.7%)                                 |
|                    | Infectious disease via exposure to SARS-CoV2 (Source Organism) | VLWAHGFEL  | HLA class I | biological activity activation Positive        | OC43 <u>VTWAAANFEL</u> (66.7%)                                |
|                    | No immunization was performed                                  | VLWAHGFEL  | HLA class I | biological activity activation Positive        |                                                               |
| 3652VYMPASWVM3660  | Infectious disease via exposure to SARS-CoV2 (Source Organism) | VYMPASWVM  | HLA-A*24:02 | biological activity activation Positive        | n.a.                                                          |
|                    | Infectious disease via exposure to SARS-CoV2 (Source Organism) | VYMPASWVM  | HLA-A*24:02 | multimer/tetramer qualitative binding positive |                                                               |
| 3059LAYYFMRFR3067  | Infectious disease via exposure to SARS-CoV2 (Source Organism) | LAYYFMRFR  | HLA-A*31:01 | biological activity activation Positive        | n.a.                                                          |
| 4862FVVEVVVDKY4870 | Infectious disease via exposure to SARS-CoV2 (Source Organism) | FVVEVVVDKY | HLA-B*15:01 | multimer/tetramer qualitative binding positive | HKU <u>FVLEVVYKY</u> (77.8%)<br>OC43 <u>FVLEVVYKY</u> (77.8%) |

**Table S5.** Toxicity of VC. Toxinpred scan for fragments of 10 amino acid length and predict their toxicity. Only residue 29-48 which is part of the beta defensin adjuvant that contain toxic fragments of 10 mer peptides.

| Peptide Sequence | SVM score | Prediction | Hydrophobicity | Hydropathicity | Hydrophilicity | Charge | Mol wt  |
|------------------|-----------|------------|----------------|----------------|----------------|--------|---------|
| GIINTLQKY        | -0.66     | Non-Toxin  | -0.04          | -0.18          | -0.7           | 1      | 1212.57 |
| IINTLQKYC        | -0.39     | Non-Toxin  | -0.05          | 0.11           | -0.8           | 1      | 1258.65 |
| INTLQKYCR        | -0.4      | Non-Toxin  | -0.3           | -0.79          | -0.32          | 2      | 1301.67 |
| NTLQKYCRV        | -0.48     | Non-Toxin  | -0.32          | -0.82          | -0.29          | 2      | 1287.64 |
| TLQKYCRVR        | -0.56     | Non-Toxin  | -0.43          | -0.92          | -0.01          | 3      | 1329.72 |
| LQKYCRVRG        | -0.54     | Non-Toxin  | -0.4           | -0.89          | 0.03           | 3      | 1285.67 |
| QKYCRVRGG        | -0.73     | Non-Toxin  | -0.44          | -1.31          | 0.21           | 3      | 1229.56 |
| KYYCRVRGGR       | -0.77     | Non-Toxin  | -0.54          | -1.41          | 0.49           | 4      | 1257.61 |
| YYCRVRGGRC       | -0.85     | Non-Toxin  | -0.43          | -0.77          | 0.09           | 3      | 1232.57 |
| YCRVRGGRCA       | -0.71     | Non-Toxin  | -0.41          | -0.46          | 0.27           | 3      | 1140.47 |
| CRVRGGRCAV       | -0.9      | Non-Toxin  | -0.35          | 0.09           | 0.35           | 3      | 1076.43 |
| RVRGGRCAVL       | -1.08     | Non-Toxin  | -0.31          | 0.22           | 0.27           | 3      | 1086.46 |
| VRGGRCAVLS       | -1.01     | Non-Toxin  | -0.16          | 0.59           | 0              | 2      | 1017.35 |
| RGGRCAVLSC       | -1.02     | Non-Toxin  | -0.21          | 0.42           | 0.05           | 2      | 1021.35 |
| GGRC AVL SCL     | -0.58     | Non-Toxin  | 0.02           | 1.25           | -0.43          | 1      | 978.33  |
| GRC AVL SCLP     | -0.6      | Non-Toxin  | 0              | 1.13           | -0.43          | 1      | 1018.39 |
| RC AVL SCLPK     | -0.63     | Non-Toxin  | -0.13          | 0.78           | -0.13          | 2      | 1089.51 |
| CA VL SCLPKE     | -0.68     | Non-Toxin  | -0.01          | 0.88           | -0.13          | 0      | 1062.44 |
| AV L SCLPKEE     | -0.71     | Non-Toxin  | -0.08          | 0.28           | 0.27           | -1     | 1088.42 |
| VL SCLPKEEQ      | -0.76     | Non-Toxin  | -0.17          | -0.25          | 0.34           | -1     | 1145.48 |
| LSCLPKEEQI       | -0.52     | Non-Toxin  | -0.15          | -0.22          | 0.31           | -1     | 1159.51 |
| SCLPKEEQIG       | -0.43     | Non-Toxin  | -0.19          | -0.64          | 0.49           | -1     | 1103.4  |
| CLPKEEQIGK       | -0.44     | Non-Toxin  | -0.27          | -0.95          | 0.76           | 0      | 1144.5  |
| LPKEEQIGKC       | -0.33     | Non-Toxin  | -0.27          | -0.95          | 0.76           | 0      | 1144.5  |
| PKEEQIGKCS       | -0.08     | Non-Toxin  | -0.35          | -1.41          | 0.97           | 0      | 1118.41 |
| KEEQIGKCST       | -0.16     | Non-Toxin  | -0.36          | -1.32          | 0.93           | 0      | 1122.4  |
| EEQIGKCSTR       | -0.07     | Non-Toxin  | -0.43          | -1.38          | 0.93           | 0      | 1150.41 |
| EQIGKCSTRG       | -0.13     | Non-Toxin  | -0.35          | -1.07          | 0.63           | 1      | 1078.35 |
| QIGKCSTRGR       | 0.18      | Toxin      | -0.47          | -1.17          | 0.63           | 3      | 1105.42 |
| IGKCSTRGRK       | 0.03      | Toxin      | -0.51          | -1.21          | 0.91           | 4      | 1105.46 |
| GKCSTRGRKC       | 0.19      | Toxin      | -0.58          | -1.41          | 0.99           | 4      | 1095.43 |
| KCSTRGRKCC       | 1.2       | Toxin      | -0.59          | -1.12          | 0.89           | 4      | 1141.51 |
| CSTRGRKCCR       | 1.57      | Toxin      | -0.65          | -1.18          | 0.89           | 4      | 1169.52 |
| STRGRKCCRR       | 1.01      | Toxin      | -0.83          | -1.88          | 1.29           | 5      | 1222.57 |
| TRGRKCCRRK       | 0.47      | Toxin      | -0.92          | -2.19          | 1.56           | 6      | 1263.67 |
| RGRKCCRRKK       | 0.18      | Toxin      | -1.01          | -2.51          | 1.9            | 7      | 1290.74 |
| GRKCCRRKKE       | 0.49      | Toxin      | -0.9           | -2.41          | 1.9            | 5      | 1263.67 |
| RKCCRRKKEA       | 0.25      | Toxin      | -0.89          | -2.19          | 1.85           | 5      | 1277.69 |
| KCCRRKKEAA       | 0.66      | Toxin      | -0.69          | -1.56          | 1.5            | 4      | 1192.58 |
| CCRRKKEAAA       | -0.02     | Non-Toxin  | -0.55          | -0.99          | 1.15           | 3      | 1135.48 |
| CRRKKEAAAK       | -0.97     | Non-Toxin  | -0.67          | -1.63          | 1.55           | 4      | 1160.52 |
| RRKKEAAAKI       | -1.29     | Non-Toxin  | -0.6           | -1.43          | 1.47           | 4      | 1170.55 |
| RKKEAAAKIL       | -1.34     | Non-Toxin  | -0.37          | -0.6           | 0.99           | 3      | 1127.53 |

|             |       |           |       |       |       |    |         |
|-------------|-------|-----------|-------|-------|-------|----|---------|
| KKEAAAKILM  | -1.38 | Non-Toxin | -0.17 | 0.04  | 0.56  | 2  | 1102.54 |
| KEAAAKILMT  | -1.5  | Non-Toxin | -0.07 | 0.36  | 0.22  | 1  | 1075.47 |
| EAAAKILMTA  | -1.53 | Non-Toxin | 0.06  | 0.93  | -0.13 | 0  | 1018.37 |
| AAAKILMTAR  | -1.37 | Non-Toxin | -0.05 | 0.83  | -0.13 | 2  | 1045.44 |
| AAKILMTART  | -1.27 | Non-Toxin | -0.1  | 0.58  | -0.12 | 2  | 1075.47 |
| AKILMTARTV  | -1.12 | Non-Toxin | -0.07 | 0.82  | -0.22 | 2  | 1103.53 |
| KILMTARTVY  | -1.58 | Non-Toxin | -0.09 | 0.51  | -0.4  | 2  | 1195.63 |
| ILMTARTVYG  | -1.31 | Non-Toxin | 0.04  | 0.86  | -0.7  | 1  | 1124.51 |
| LMTARTVYGP  | -1.17 | Non-Toxin | -0.04 | 0.25  | -0.52 | 1  | 1108.46 |
| MTARTVYGPG  | -1.18 | Non-Toxin | -0.08 | -0.17 | -0.34 | 1  | 1052.35 |
| TARTVYGPGP  | -0.81 | Non-Toxin | -0.11 | -0.52 | -0.21 | 1  | 1018.27 |
| ARTVYGPGPG  | -0.79 | Non-Toxin | -0.08 | -0.49 | -0.17 | 1  | 974.22  |
| RTVYGPGPGT  | -0.69 | Non-Toxin | -0.12 | -0.74 | -0.16 | 1  | 1004.25 |
| TVYGPGPGTM  | -0.5  | Non-Toxin | 0.08  | -0.1  | -0.59 | 0  | 979.26  |
| VYGPGPGTML  | -0.66 | Non-Toxin | 0.15  | 0.35  | -0.73 | 0  | 991.32  |
| YGPGP GTMLF | -0.58 | Non-Toxin | 0.16  | 0.21  | -0.83 | 0  | 1039.36 |
| GPGPGT MLFT | -0.62 | Non-Toxin | 0.14  | 0.27  | -0.64 | 0  | 977.29  |
| PGPGT MLFTM | -0.58 | Non-Toxin | 0.15  | 0.5   | -0.77 | 0  | 1051.43 |
| GPGT MLFTML | -0.74 | Non-Toxin | 0.21  | 1.04  | -0.95 | 0  | 1067.48 |
| PGT MLFTMLR | -0.83 | Non-Toxin | 0.02  | 0.63  | -0.65 | 1  | 1166.61 |
| GT MLFTMLRK | -0.77 | Non-Toxin | -0.09 | 0.4   | -0.35 | 2  | 1197.67 |
| T MLFTMLRKG | -0.71 | Non-Toxin | -0.09 | 0.4   | -0.35 | 2  | 1197.67 |
| MLFTMLRKGP  | -0.94 | Non-Toxin | -0.08 | 0.31  | -0.31 | 2  | 1193.68 |
| LFTMLRKGP   | -0.78 | Non-Toxin | -0.09 | 0.08  | -0.18 | 2  | 1119.54 |
| FTMLRKGP    | -0.63 | Non-Toxin | -0.15 | -0.46 | 0     | 2  | 1103.49 |
| TMLRKGP     | -0.63 | Non-Toxin | -0.19 | -0.78 | 0.25  | 2  | 1013.37 |
| MLRKGP      | -0.84 | Non-Toxin | -0.17 | -0.84 | 0.06  | 2  | 1075.44 |
| LRKGP       | -0.76 | Non-Toxin | -0.14 | -0.65 | 0.01  | 2  | 1057.41 |
| RKGP        | -0.69 | Non-Toxin | -0.26 | -1.38 | 0.21  | 2  | 1058.35 |
| KGP         | -0.68 | Non-Toxin | -0.1  | -1    | -0.13 | 1  | 1003.27 |
| GPG         | -0.79 | Non-Toxin | 0.06  | -0.23 | -0.61 | 0  | 988.26  |
| PG          | -1.06 | Non-Toxin | 0.03  | -0.26 | -0.65 | 0  | 1032.31 |
| G           | -1.18 | Non-Toxin | 0.09  | 0.28  | -0.83 | 0  | 1048.36 |
| P           | -1.33 | Non-Toxin | 0.1   | 0.5   | -0.88 | 0  | 1062.38 |
| G           | -1.31 | Non-Toxin | 0.16  | 1.08  | -1.03 | 0  | 1064.4  |
| Y           | -1.47 | Non-Toxin | 0.08  | 0.77  | -0.73 | -1 | 1136.46 |
| L           | -1.49 | Non-Toxin | 0.1   | 1.08  | -0.55 | -1 | 1044.36 |
| N           | -1.44 | Non-Toxin | 0.07  | 0.88  | -0.42 | -1 | 1002.27 |
| T           | -1.39 | Non-Toxin | 0.16  | 1.41  | -0.49 | -1 | 959.24  |
| L           | -1.24 | Non-Toxin | 0.07  | 1.09  | -0.15 | 0  | 986.31  |
| T           | -1.15 | Non-Toxin | 0.05  | 0.62  | -0.31 | 0  | 1059.36 |
| L           | -1.13 | Non-Toxin | 0.05  | 0.61  | -0.24 | 0  | 1045.33 |
| A           | -0.98 | Non-Toxin | 0.02  | 0.42  | -0.19 | 0  | 1063.36 |
| V           | -0.97 | Non-Toxin | 0.02  | 0.42  | -0.19 | 0  | 1063.36 |
| E           | -0.97 | Non-Toxin | -0.05 | -0.07 | -0.08 | 0  | 1065.33 |
| A           | -0.78 | Non-Toxin | 0.01  | 0.15  | -0.61 | 1  | 1099.39 |
| A           | -0.52 | Non-Toxin | -0.01 | -0.16 | -0.79 | 1  | 1191.49 |

|             |       |           |      |      |       |    |         |
|-------------|-------|-----------|------|------|-------|----|---------|
| AKWSMATYYL  | -0.54 | Non-Toxin | 0.02 | 0.04 | -0.92 | 1  | 1233.58 |
| KWSMATYYLF  | -0.72 | Non-Toxin | 0.05 | 0.14 | -1.12 | 1  | 1309.68 |
| WSMATYYLFA  | -0.98 | Non-Toxin | 0.19 | 0.71 | -1.47 | 0  | 1252.58 |
| SMATYYLFAA  | -1.02 | Non-Toxin | 0.17 | 0.98 | -1.18 | 0  | 1137.44 |
| MATYYLFAAG  | -1.21 | Non-Toxin | 0.22 | 1.02 | -1.21 | 0  | 1107.42 |
| ATYYLFAAGY  | -0.96 | Non-Toxin | 0.19 | 0.7  | -1.31 | 0  | 1139.4  |
| TYYLFAAGYV  | -1.07 | Non-Toxin | 0.22 | 0.94 | -1.41 | 0  | 1167.46 |
| YYLFAAGYVF  | -1.16 | Non-Toxin | 0.3  | 1.29 | -1.62 | 0  | 1213.53 |
| YLFAAGYVFC  | -0.97 | Non-Toxin | 0.3  | 1.67 | -1.49 | 0  | 1153.49 |
| LFAAGYVFCT  | -0.8  | Non-Toxin | 0.28 | 1.73 | -1.3  | 0  | 1091.42 |
| FAAGYVFCTV  | -0.84 | Non-Toxin | 0.28 | 1.77 | -1.27 | 0  | 1077.39 |
| AAGYVFCTVN  | -0.83 | Non-Toxin | 0.16 | 1.14 | -1    | 0  | 1044.32 |
| AGYVFCTVNA  | -0.54 | Non-Toxin | 0.16 | 1.14 | -1    | 0  | 1044.32 |
| GYVFCTVNAL  | -0.46 | Non-Toxin | 0.19 | 1.34 | -1.13 | 0  | 1086.41 |
| YVFCTVNALA  | -0.69 | Non-Toxin | 0.2  | 1.56 | -1.18 | 0  | 1100.43 |
| VFCTVNALAA  | -0.7  | Non-Toxin | 0.22 | 1.87 | -1    | 0  | 1008.33 |
| FCTVNALAAAG | -0.68 | Non-Toxin | 0.18 | 1.41 | -0.85 | 0  | 966.25  |
| CTVNALAAAGL | -0.94 | Non-Toxin | 0.17 | 1.51 | -0.78 | 0  | 932.24  |
| TVNALAAAGLM | -1.05 | Non-Toxin | 0.2  | 1.45 | -0.81 | 0  | 960.3   |
| VNALAAAGLMI | -0.98 | Non-Toxin | 0.29 | 1.97 | -0.95 | 0  | 972.36  |
| NALAAAGLMIE | -0.83 | Non-Toxin | 0.17 | 1.2  | -0.5  | -1 | 1002.34 |
| ALAAGLMIER  | -1.32 | Non-Toxin | 0.06 | 1.1  | -0.22 | 0  | 1044.42 |
| LAAGLMIERF  | -1.44 | Non-Toxin | 0.09 | 1.2  | -0.42 | 0  | 1120.52 |
| AAGLMIERFV  | -1.39 | Non-Toxin | 0.09 | 1.24 | -0.39 | 0  | 1106.49 |
| AGLMIERFVS  | -1.39 | Non-Toxin | 0.04 | 0.98 | -0.31 | 0  | 1122.49 |
| GLMIERFVSL  | -1.51 | Non-Toxin | 0.07 | 1.18 | -0.44 | 0  | 1164.58 |
| LMIERFVSLA  | -1.61 | Non-Toxin | 0.08 | 1.4  | -0.49 | 0  | 1178.6  |
| MIERFVSLAA  | -1.63 | Non-Toxin | 0.05 | 1.2  | -0.36 | 0  | 1136.51 |
| IERFVSLAAG  | -1.52 | Non-Toxin | 0.04 | 0.97 | -0.23 | 0  | 1062.37 |
| ERFVSLAAGF  | -1.64 | Non-Toxin | 0.03 | 0.8  | -0.3  | 0  | 1096.38 |
| RFVSLAAGFE  | -1.32 | Non-Toxin | 0.03 | 0.8  | -0.3  | 0  | 1096.38 |
| FVSLAAGFEL  | -1.5  | Non-Toxin | 0.26 | 1.63 | -0.78 | -1 | 1053.36 |
| VSLAAGFELE  | -1.46 | Non-Toxin | 0.14 | 1    | -0.23 | -2 | 1035.3  |
| SLAAGFELED  | -1.24 | Non-Toxin | 0.01 | 0.23 | 0.22  | -3 | 1051.25 |
| LAAGFELEDF  | -1.48 | Non-Toxin | 0.1  | 0.59 | -0.06 | -3 | 1111.35 |
| AAGFELEDFI  | -1.35 | Non-Toxin | 0.12 | 0.66 | -0.06 | -3 | 1111.35 |
| AGFELEDFIP  | -1.22 | Non-Toxin | 0.09 | 0.32 | -0.01 | -3 | 1137.39 |
| GFELEDFIPM  | -1.04 | Non-Toxin | 0.09 | 0.33 | -0.09 | -3 | 1197.51 |
| FELEDFIPMA  | -1.18 | Non-Toxin | 0.1  | 0.55 | -0.14 | -3 | 1211.53 |
| ELEDFIPMAA  | -1.24 | Non-Toxin | 0.06 | 0.45 | 0.06  | -3 | 1135.43 |
| LEDFIPMAAG  | -1.15 | Non-Toxin | 0.14 | 0.76 | -0.24 | -2 | 1063.37 |
| EDFIPMAAGM  | -1.08 | Non-Toxin | 0.11 | 0.57 | -0.19 | -2 | 1081.4  |
| DFIPMAAGMA  | -1.17 | Non-Toxin | 0.2  | 1.1  | -0.54 | -1 | 1023.36 |
| FIPMAAGMAS  | -0.98 | Non-Toxin | 0.24 | 1.37 | -0.81 | 0  | 995.35  |
| IPMAAGMASL  | -0.96 | Non-Toxin | 0.24 | 1.47 | -0.74 | 0  | 961.34  |
| PMAAGMASLV  | -0.95 | Non-Toxin | 0.22 | 1.44 | -0.71 | 0  | 947.31  |
| MAAGMASLVL  | -1.13 | Non-Toxin | 0.28 | 1.98 | -0.89 | 0  | 963.36  |

|            |       |           |       |       |       |     |         |
|------------|-------|-----------|-------|-------|-------|-----|---------|
| AAGMASLVLA | -1.06 | Non-Toxin | 0.28  | 1.97  | -0.81 | 0   | 903.24  |
| AGMASLVLAR | -1.08 | Non-Toxin | 0.07  | 1.34  | -0.46 | 1   | 988.35  |
| GMASVLARK  | -1.17 | Non-Toxin | -0.06 | 0.77  | -0.11 | 2   | 1045.45 |
| MASVLARKA  | -1.23 | Non-Toxin | -0.05 | 0.99  | -0.16 | 2   | 1059.47 |
| ASVLARKAA  | -1.11 | Non-Toxin | -0.05 | 0.98  | -0.08 | 2   | 999.35  |
| SLVLARKAAG | -1.16 | Non-Toxin | -0.06 | 0.76  | -0.03 | 2   | 985.33  |
| LVLARKAAGC | -0.98 | Non-Toxin | -0.03 | 1.09  | -0.16 | 2   | 1001.39 |
| VLARKAAGCQ | -0.54 | Non-Toxin | -0.15 | 0.36  | 0.04  | 2   | 1016.36 |
| LARKAAGCQY | -0.5  | Non-Toxin | -0.21 | -0.19 | -0.04 | 2   | 1080.4  |
| ARKAAGCQYL | -0.51 | Non-Toxin | -0.21 | -0.19 | -0.04 | 2   | 1080.4  |
| RKAAGCQYLN | -0.56 | Non-Toxin | -0.29 | -0.72 | 0.03  | 2   | 1123.43 |
| KAAGCQYLNT | -0.54 | Non-Toxin | -0.14 | -0.34 | -0.31 | 1   | 1068.35 |
| AAGCQYLNTL | -0.72 | Non-Toxin | 0.03  | 0.43  | -0.79 | 0   | 1053.34 |
| AGCQYLNTLT | -0.72 | Non-Toxin | -0.02 | 0.18  | -0.78 | 0   | 1083.37 |
| GCQYLNTLTL | -0.86 | Non-Toxin | 0.01  | 0.38  | -0.91 | 0   | 1125.46 |
| CQYLNTLTLA | -1.19 | Non-Toxin | 0.02  | 0.6   | -0.96 | 0   | 1139.48 |
| QYLNTLTLAA | -1.46 | Non-Toxin | 0.04  | 0.53  | -0.91 | 0   | 1107.42 |
| YLNTLTLAAG | -1.48 | Non-Toxin | 0.13  | 0.84  | -0.93 | 0   | 1036.34 |
| LNTLTLAAGF | -1.43 | Non-Toxin | 0.19  | 1.25  | -0.95 | 0   | 1020.34 |
| NTLTLAAGFS | -1.42 | Non-Toxin | 0.11  | 0.79  | -0.74 | 0   | 994.25  |
| TLTLAAGFSY | -1.48 | Non-Toxin | 0.17  | 1.01  | -0.99 | 0   | 1043.32 |
| LTLAAGFSYF | -1.44 | Non-Toxin | 0.25  | 1.36  | -1.2  | 0   | 1089.39 |
| TLAAGFSYFA | -1.5  | Non-Toxin | 0.22  | 1.16  | -1.07 | 0   | 1047.3  |
| LAAGFSYFAV | -1.41 | Non-Toxin | 0.3   | 1.65  | -1.18 | 0   | 1045.33 |
| AAGFSYFAVH | -1.29 | Non-Toxin | 0.2   | 0.95  | -1.05 | 0.5 | 1069.31 |
| AGFSYFAVHF | -1.31 | Non-Toxin | 0.24  | 1.05  | -1.25 | 0.5 | 1145.41 |
| GFSYFAVHFI | -1.29 | Non-Toxin | 0.29  | 1.32  | -1.38 | 0.5 | 1187.5  |

---

**Table S6.** VC evaluation for possible CTL epitopes that will be generated and homology of new epitopes with human peptides.

| Start | Peptide    | HLA alleles                                                                                                                                                                                                                                                                                                                                                   | Human proteins                             | human peptides                         |
|-------|------------|---------------------------------------------------------------------------------------------------------------------------------------------------------------------------------------------------------------------------------------------------------------------------------------------------------------------------------------------------------------|--------------------------------------------|----------------------------------------|
| 0     | GIINTLQKY  | HLA-A*29:01, HLA-B*15:01, HLA-B*15:12                                                                                                                                                                                                                                                                                                                         | similar with human beta defensin           | <sup>33</sup> GIINTLQKY <sup>41</sup>  |
| 1     | IINTLQKYY  | HLA-A*29:01                                                                                                                                                                                                                                                                                                                                                   | similar with human beta defensin           | <sup>34</sup> IINTLQKYY <sup>42</sup>  |
| 3     | NTLQKYYCR  | HLA-A*33:03                                                                                                                                                                                                                                                                                                                                                   | similar with human beta defensin           | <sup>4</sup> NTLQKYYCR <sup>12</sup>   |
| 4     | TLQKYYCRV  | HLA-A*02:03                                                                                                                                                                                                                                                                                                                                                   | similar with human beta defensin           | <sup>37</sup> TLQKYYCRV <sup>45</sup>  |
| 11    | RVRGGRCVAV | HLA-A*30:01, HLA-B*07:02, HLA-B*07:05, HLA-B*56:01,                                                                                                                                                                                                                                                                                                           | similar with human beta defensin           | <sup>44</sup> RVRGGRCVAV <sup>52</sup> |
| 12    | VRGGRCVAVL | HLA-B*27:06                                                                                                                                                                                                                                                                                                                                                   | similar with human beta defensin           | <sup>45</sup> VRGGRCVAVL <sup>53</sup> |
| 15    | GRCVAVLSCL | HLA-B*27:06                                                                                                                                                                                                                                                                                                                                                   | similar with human beta defensin           | <sup>48</sup> GRCVAVLSCL <sup>56</sup> |
| 46    | AAAKKSAFY  | HLA-A*01:01, HLA-B*15:12,                                                                                                                                                                                                                                                                                                                                     | Mitochondrial ribosomal protein L1         | <sup>22</sup> AAAKKSA <sup>28</sup>    |
| 47    | AAKKSIFY   | HLA-A*30:01                                                                                                                                                                                                                                                                                                                                                   |                                            |                                        |
| 51    | SAFYILPSI  | HLA-A*32:01, HLA-B*13:02, HLA-B*51:01, HLA-B*51:02, HLA-B*52:01                                                                                                                                                                                                                                                                                               |                                            |                                        |
| 52    | AFYILPSII  | HLA-B*52:01                                                                                                                                                                                                                                                                                                                                                   |                                            |                                        |
| 56    | LPSIISNEK  | HLA-B*56:01                                                                                                                                                                                                                                                                                                                                                   |                                            |                                        |
| 94    | SLRPDTRYV  | HLA-A*02:03                                                                                                                                                                                                                                                                                                                                                   |                                            |                                        |
| 95    | LRPDTRYVL  | HLA-B*27:06                                                                                                                                                                                                                                                                                                                                                   |                                            |                                        |
| 96    | RPDTRYVLM  | HLA-B*07:02, HLA-B*07:05,                                                                                                                                                                                                                                                                                                                                     |                                            |                                        |
| 103   | LMDGPGPGV  | HLA-A*02:01                                                                                                                                                                                                                                                                                                                                                   | immunoglobulin heavy chain junction region | 4DGPDPGV10                             |
| 110   | GVSTQEFY   | HLA-A*01:01, HLA-A*29:01,                                                                                                                                                                                                                                                                                                                                     |                                            |                                        |
| 116   | FRYMNSQGL  | HLA-B*15:10, HLA-B*27:06, HLA-B*38:02                                                                                                                                                                                                                                                                                                                         |                                            |                                        |
| 117   | RYMNSQGLL  | HLA-A*24:02, HLA-A*24:07, HLA-A*24:10                                                                                                                                                                                                                                                                                                                         |                                            |                                        |
| 125   | LEAAAKWSM  | HLA-B*18:01, HLA-B*18:02, HLA-B*40:01, HLA-B*44:03,                                                                                                                                                                                                                                                                                                           |                                            |                                        |
| 128   | AAKWSMATY  | HLA-A*30:01, HLA-B*15:01, HLA-B*15:02, HLA-B*15:12, HLA-B*15:13, HLA-B*15:17, HLA-B*15:21, HLA-B*15:25, HLA-B*15:32, HLA-B*35:05, HLA-B*35:30, HLA-B*46:01, HLA-B*57:01                                                                                                                                                                                       |                                            |                                        |
| 130   | KWSMATYYL  | HLA-A*24:02, HLA-A*24:07, HLA-A*24:10                                                                                                                                                                                                                                                                                                                         |                                            |                                        |
| 131   | WSMATYYLF* | HLA-A*24:02, HLA-A*24:07, HLA-A*24:10, HLA-B*15:13, HLA-B*15:17, HLA-B*57:01, HLA-B*58:01                                                                                                                                                                                                                                                                     |                                            |                                        |
| 133   | MATYYLFAA  | HLA-B*56:01                                                                                                                                                                                                                                                                                                                                                   |                                            |                                        |
| 135   | TYYLFAAGY  | HLA-A*29:01                                                                                                                                                                                                                                                                                                                                                   |                                            |                                        |
| 136   | YYLFAAGYV  | HLA-A*24:10                                                                                                                                                                                                                                                                                                                                                   |                                            |                                        |
| 137   | YLFAAGYVF  | HLA-A*02:01, HLA-A*02:06, HLA-A*02:07, HLA-A*24:02, HLA-A*24:07, HLA-A*29:01, HLA-A*32:01, HLA-B*13:01, HLA-B*15:01, HLA-B*15:02, HLA-B*15:10, HLA-B*15:12, HLA-B*15:13, HLA-B*15:21, HLA-B*15:25, HLA-B*15:32, HLA-B*18:01, HLA-B*18:02, HLA-B*35:01, HLA-B*35:02, HLA-B*35:05, HLA-B*35:30, HLA-B*38:02, HLA-B*46:01, HLA-B*48:01, HLA-B*56:01, HLA-B*56:02 | immunoglobulin light chain junction region | 8FAAGYVF14                             |
| 143   | YVFCTVNAL* | HLA-A*02:01, HLA-A*02:03, HLA-A*02:06, HLA-A*02:07, HLA-A*26:01, HLA-A*34:01, HLA-B*07:02, HLA-B*07:05, HLA-B*15:02, HLA-B*15:10, HLA-B*15:21, HLA-B*35:01, HLA-B*35:02, HLA-B*35:05, HLA-B*35:30, HLA-B*38:02, HLA-B*46:01, HLA-B*48:01, HLA-B*56:01, HLA-B*56:02,                                                                                           |                                            |                                        |
| 155   | LMIERFVSL* | HLA-A*02:01, HLA-A*02:03, HLA-A*02:06, HLA-A*02:07, HLA-A*32:01, HLA-B*08:01, HLA-B*15:01, HLA-B*15:02, HLA-B*15:10, HLA-B*15:12, HLA-B*15:21, HLA-B*15:25, HLA-B*15:32, HLA-B*35:02, HLA-B*37:01, HLA-B*38:02, HLA-B*46:01, HLA-B*48:01,                                                                                                                     |                                            |                                        |
| 157   | IERFVSLAA  | HLA-B*40:06, HLA-B*41:01,                                                                                                                                                                                                                                                                                                                                     |                                            |                                        |
| 159   | RFVSLAAGF  | HLA-A*24:02, HLA-A*24:10,                                                                                                                                                                                                                                                                                                                                     | hCG2019424                                 | 52VSLAAGF58                            |
| 161   | VSLAAGFEL  | HLA-B*58:01                                                                                                                                                                                                                                                                                                                                                   | hCG2019424                                 | 52VSLAAGF58                            |

|     |            |                                                                                                                                                                                                                                |
|-----|------------|--------------------------------------------------------------------------------------------------------------------------------------------------------------------------------------------------------------------------------|
| 167 | FELEDFIPM* | HLA-B*13:01, HLA-B*13:02, HLA-B*15:10,<br>HLA-B*18:01, HLA-B*18:02, HLA-B*35:02,<br>HLA-B*37:01, HLA-B*38:02, HLA-B*40:01,<br>HLA-B*40:02, HLA-B*40:06, HLA-B*41:01,<br>HLA-B*44:03, HLA-B*48:01,                              |
| 175 | MAAGMASLV  | HLA-B*56:01, HLA-B*56:07,                                                                                                                                                                                                      |
| 178 | GMASLVLAR  | HLA-A*74:01                                                                                                                                                                                                                    |
| 179 | MASLVLARK* | HLA-A*03:01, HLA-A*11:01, HLA-A*11:04,<br>HLA-A*30:01, HLA-A*33:03, HLA-A*34:01,<br>HLA-A*74:01                                                                                                                                |
| 186 | RKAAGCQYL  | HLA-B*27:06, HLA-B*48:01,                                                                                                                                                                                                      |
| 191 | CQYLNTLT*  | HLA-B*13:01, HLA-B*13:02, HLA-B*15:10,<br>HLA-B*27:06, HLA-B*37:01, HLA-B*38:02,<br>HLA-B*48:01, HLA-B*52:01,                                                                                                                  |
| 193 | YLNTLTAA   | HLA-A*02:03                                                                                                                                                                                                                    |
| 197 | LTLAAGFSY  | HLA-A*01:01, HLA-A*11:01, HLA-A*29:01,<br>HLA-B*15:01, HLA-B*15:02, HLA-B*15:12,<br>HLA-B*15:13, HLA-B*15:17, HLA-B*15:21,<br>HLA-B*15:25, HLA-B*35:01, HLA-B*35:05,<br>HLA-B*35:30, HLA-B*46:01, HLA-B*57:01,<br>HLA-B*58:01, |
| 198 | TLAAGFSYF  | HLA-A*26:01, HLA-A*29:01, HLA-A*32:01,<br>HLA-A*34:01, HLA-B*15:01, HLA-B*15:02,<br>HLA-B*15:12, HLA-B*15:13, HLA-B*15:21,<br>HLA-B*15:25, HLA-B*15:32, HLA-B*46:01,                                                           |
| 202 | GFSYFAVHF  | HLA-A*24:02, HLA-A*24:10,                                                                                                                                                                                                      |
| 203 | FSYFAVHFI* | HLA-B*13:02, HLA-B*51:01, HLA-B*51:02,<br>HLA-B*52:01,                                                                                                                                                                         |

\*CTL epitopes originally put in the vaccine construct



**Table S7.** VC evaluation for possible HTL epitopes that will be generated and possibility of new epitopes homology with human peptides.

| Pos | 15-mer peptide   | Of | Core peptide | HLA alleles                                                                                                                                                                                                                        |
|-----|------------------|----|--------------|------------------------------------------------------------------------------------------------------------------------------------------------------------------------------------------------------------------------------------|
| 48  | AAKSAFYILPSIIS   | 6  | FYILPSIIS    | DRB1*04:05, DRB1*10:01, DRB1*16:02                                                                                                                                                                                                 |
| 49  | AKKSAFYILPSIISN  | 5  | FYILPSIIS    | DRB1*01:01, DRB1*04:01, DRB1*04:03, DRB1*04:05, DRB1*04:06, DRB1*08:03, DRB1*10:01, DRB1*11:01, DRB1*12:02, DRB1*14:07, DRB1*15:02, DRB1*16:02,                                                                                    |
| 50  | KKSAFYILPSIISNE  | 4  | FYILPSIIS    | DRB1*01:01, DRB1*04:01, DRB1*04:02, DRB1*04:03, DRB1*04:05, DRB1*04:06, DRB1*07:01, DRB1*08:03, DRB1*09:01, DRB1*10:01, DRB1*11:01, DRB1*12:02, DRB1*14:07, DRB1*15:01, DRB1*15:02, DRB1*16:02,                                    |
| 51  | KSAFYILPSIISNEK* | 3  | FYILPSIIS    | DRB1*01:01, DRB1*04:01, DRB1*04:02, DRB1*04:03, DRB1*04:05, DRB1*04:06, DRB1*07:01, DRB1*08:03, DRB1*09:01, DRB1*10:01, DRB1*11:01, DRB1*12:02, DRB1*13:02, DRB1*14:04, DRB1*14:05, DRB1*14:07, DRB1*15:01, DRB1*15:02, DRB1*16:02 |
| 52  | SAFYILPSIISNEKG  | 2  | FYILPSIIS    | DRB1*01:01, DRB1*04:01, DRB1*04:03, DRB1*04:05, DRB1*04:06, DRB1*08:03, DRB1*10:01, DRB1*11:01, DRB1*12:02, DRB1*14:07, DRB1*15:02, DRB1*16:02,                                                                                    |
| 53  | AFYILPSIISNEKGP  | 1  | FYILPSIIS    | DRB1*01:01, DRB1*10:01, DRB1*16:02                                                                                                                                                                                                 |
| 55  | YLPSIISNEKGPGP   | 5  | IISNEKGPG    | DRB1*0301, DRB1*11:01, DRB1*13:02, DRB1*1401, DRB1*14:04, DRB1*1405, DRB1*14:07, DRB1*1454,                                                                                                                                        |
| 56  | ILPSIISNEKGPGPG  | 4  | IISNEKGPG    | DRB1*0301, DRB1*11:01, DRB1*13:02, DRB1*1401, DRB1*14:04, DRB1*1405, DRB1*14:07, DRB1*1454,                                                                                                                                        |
| 57  | LPSIISNEKGPGPGG  | 3  | IISNEKGPG    | DRB1*0301, DRB1*11:01, DRB1*13:02, DRB1*1401, DRB1*14:04, DRB1*1405, DRB1*14:07, DRB1*1454,                                                                                                                                        |
| 58  | PSIISNEKGPGPGGR  | 2  | IISNEKGPG    | DRB1*0301, DRB1*11:01, DRB1*13:02, DRB1*1401, DRB1*14:04, DRB1*1405, DRB1*14:07, DRB1*1454,                                                                                                                                        |
| 68  | GPGRLIIRENNRVV   | 5  | LIIRENNRV    | DRB1*04:02, DRB1*13:02, DRB1*14:04, DRB1*15:01, DRB1*15:02                                                                                                                                                                         |
| 69  | PGGRLIIRENNRVVI  | 4  | LIIRENNRV    | DRB1*04:02, DRB1*08:03, DRB1*13:02, DRB1*1401, DRB1*14:04, DRB1*1405, DRB1*1454, DRB1*15:01, DRB1*15:02, DRB1*16:02,                                                                                                               |
| 70  | GGRLIIRENNRVVIS  | 5  | IRENNRVVI    | DRB1*0301, DRB1*04:02, DRB1*08:03, DRB1*12:02, DRB1*13:02, DRB1*1401, DRB1*14:04, DRB1*1405, DRB1*14:07, DRB1*1454, DRB1*15:01, DRB1*15:02, DRB1*16:02                                                                             |
| 71  | GRLIIRENNRVVISS* | 4  | IRENNRVVI    | DRB1*0301, DRB1*04:02, DRB1*12:02, DRB1*13:02, DRB1*1401, DRB1*14:04, DRB1*1405, DRB1*14:07, DRB1*1454, DRB1*15:01, DRB1*15:02, DRB1*16:02,                                                                                        |
| 72  | RLIIRENNRVVISSD* | 3  | IRENNRVVI    | DRB1*0301, DRB1*04:02, DRB1*13:02, DRB1*1401, DRB1*14:04, DRB1*1405, DRB1*14:07, DRB1*1454, DRB1*15:01, DRB1*15:02,                                                                                                                |
| 73  | LIIRENNRVVISSDG  | 2  | IRENNRVVI    | DRB1*13:02, DRB1*1401, DRB1*1405, DRB1*14:07, DRB1*1454                                                                                                                                                                            |
| 74  | IIRENNRVVISSDGP  | 1  | IRENNRVVI    | DRB1*13:02                                                                                                                                                                                                                         |
| 76  | RENNRVVISSDGP    | 5  | VVISSDGP**   | DRB1*04:01, DRB1*04:02, DRB1*04:03, DRB1*04:06,                                                                                                                                                                                    |
| 77  | ENNRVVISSDGP     | 4  | VVISSDGP**   | DRB1*04:01, DRB1*04:02, DRB1*04:03, DRB1*04:05, DRB1*04:06                                                                                                                                                                         |
| 78  | NNRVVISSDGP      | 5  | ISSDGP       | DRB1*0301, DRB1*04:01, DRB1*04:02, DRB1*04:03, DRB1*04:05, DRB1*04:06,                                                                                                                                                             |
| 79  | NRVVISSDGP       | 4  | ISSDGP       | DRB1*0301, DRB1*04:01, DRB1*04:02, DRB1*04:03, DRB1*04:06                                                                                                                                                                          |
| 80  | RVVISSDGP        | 3  | ISSDGP       | DRB1*0301, DRB1*04:01,                                                                                                                                                                                                             |
| 89  | GPGAYESLRPDTRYV  | 4  | YESLRPDTR    | DRB1*01:01                                                                                                                                                                                                                         |
| 90  | PGAYESLRPDTRYVL  | 3  | YESLRPDTR    | DRB1*01:01, DRB1*0301, DRB1*1401, DRB1*1454,                                                                                                                                                                                       |
| 91  | GAYESLRPDTRYVLM  | 5  | LRPDTRYVL    | DRB1*0301, DRB1*13:02, DRB1*1401, DRB1*14:04, DRB1*1405, DRB1*14:07, DRB1*1454                                                                                                                                                     |
| 92  | AYESLRPDTRYVLM   | 4  | LRPDTRYVL    | DRB1*0301, DRB1*13:02, DRB1*1401, DRB1*14:04, DRB1*1405, DRB1*14:07, DRB1*1454                                                                                                                                                     |
| 93  | YESLRPDTRYVLM    | 3  | LRPDTRYVL    | DRB1*0301, DRB1*13:02, DRB1*1401, DRB1*14:04, DRB1*1405, DRB1*14:07, DRB1*1454                                                                                                                                                     |
| 94  | ESLRPDTRYVLM     | 2  | LRPDTRYVL    | DRB1*0301, DRB1*13:02, DRB1*1401, DRB1*14:04, DRB1*1405, DRB1*14:07, DRB1*1454                                                                                                                                                     |
| 95  | SLRPDTRYVLM      | 1  | LRPDTRYVL    | DRB1*0301                                                                                                                                                                                                                          |
| 97  | RPDTRYVLM        | 5  | YVLM         | DRB1*01:01, DRB1*10:01, DRB1*16:02                                                                                                                                                                                                 |
| 98  | PDTRYVLM         | 4  | YVLM         | DRB1*01:01, DRB1*04:01, DRB1*10:01, DRB1*16:02,                                                                                                                                                                                    |
| 99  | DTRYVLM          | 3  | YVLM         | DRB1*01:01, DRB1*0301, DRB1*04:01, DRB1*10:01, DRB1*16:02                                                                                                                                                                          |
| 100 | TRYVLM           | 2  | YVLM         | DRB1*01:01, DRB1*0301,                                                                                                                                                                                                             |
| 111 | GVSTQEFYRMNSQGL  | 6  | FRYMNSQGL    | DRB1*01:01, DRB1*07:01, DRB1*08:03, DRB1*09:01, DRB1*10:01, DRB1*15:02, DRB1*16:02                                                                                                                                                 |

|     |                  |   |             |                                                                                                                                                                                                                                                            |
|-----|------------------|---|-------------|------------------------------------------------------------------------------------------------------------------------------------------------------------------------------------------------------------------------------------------------------------|
| 112 | VSTQEFYRMNSQGLL* | 5 | FRYMNSQGL   | DRB1*01:01, DRB1*04:01, DRB1*04:05, DRB1*07:01, DRB1*08:03, DRB1*09:01, DRB1*10:01, DRB1*12:02, DRB1*13:02, DRB1*14:07, DRB1*15:01, DRB1*15:02, DRB1*16:02                                                                                                 |
| 113 | STQEFYRMNSQGLLE  | 4 | FRYMNSQGL   | DRB1*01:01, DRB1*04:01, DRB1*04:02, DRB1*04:03, DRB1*04:05, DRB1*04:06, DRB1*07:01, DRB1*08:03, DRB1*09:01, DRB1*10:01, DRB1*11:01, DRB1*12:02, DRB1*13:02, DRB1*14:01, DRB1*14:04, DRB1*14:07, DRB1*14:54, DRB1*15:01, DRB1*15:02, DRB1*16:02             |
| 114 | TQEFYRMNSQGLLEA  | 3 | FRYMNSQGL   | DRB1*01:01, DRB1*04:01, DRB1*04:02, DRB1*04:03, DRB1*04:05, DRB1*04:06, DRB1*07:01, DRB1*08:03, DRB1*09:01, DRB1*10:01, DRB1*11:01, DRB1*12:02, DRB1*13:02, DRB1*14:01, DRB1*14:04, DRB1*14:05, DRB1*14:07, DRB1*14:54, DRB1*15:01, DRB1*15:02, DRB1*16:02 |
| 115 | QEFYRMNSQGLLEAA  | 2 | FRYMNSQGL   | DRB1*01:01, DRB1*04:01, DRB1*04:05, DRB1*07:01, DRB1*08:03, DRB1*09:01, DRB1*10:01, DRB1*12:02, DRB1*13:02, DRB1*14:07, DRB1*15:01, DRB1*15:02, DRB1*16:02                                                                                                 |
| 116 | EFRYMNSQGLLEAAA  | 1 | FRYMNSQGL   | DRB1*01:01, DRB1*07:01, DRB1*09:01, DRB1*10:01, DRB1*15:02, DRB1*16:02                                                                                                                                                                                     |
| 121 | NSQGLLEAAAKWSMA  | 5 | LEAAAKWSM   | DRB1*14:01, DRB1*14:04, DRB1*14:05, DRB1*14:54,                                                                                                                                                                                                            |
| 122 | SQGLLEAAAKWSMAT  | 4 | LEAAAKWSM   | DRB1*14:01, DRB1*14:04, DRB1*14:05, DRB1*14:54,                                                                                                                                                                                                            |
| 123 | QGLLEAAAKWSMATY  | 3 | LEAAAKWSM   | DRB1*14:01, DRB1*14:04, DRB1*14:05, DRB1*14:54,                                                                                                                                                                                                            |
| 139 | LFAAGYVFCTVNALA  | 5 | YVFCTVNAL   | DRB1*09:01                                                                                                                                                                                                                                                 |
| 140 | FAAGYVFCTVNALAA  | 4 | YVFCTVNAL   | DRB1*01:01, DRB1*07:01, DRB1*09:01, DRB1*10:01, DRB1*14:07                                                                                                                                                                                                 |
| 141 | AAGYVFCTVNALAAG  | 3 | YVFCTVNAL   | DRB1*01:01, DRB1*04:01, DRB1*07:01, DRB1*09:01, DRB1*10:01, DRB1*14:07, DRB1*16:02                                                                                                                                                                         |
| 142 | AGYVFCTVNALAAGL  | 2 | YVFCTVNAL   | DRB1*01:01, DRB1*09:01, DRB1*10:01                                                                                                                                                                                                                         |
| 153 | AAGLMIERFVSLAAG  | 5 | IERFVSLAA   | DRB1*04:02, DRB1*15:01, DRB1*15:02                                                                                                                                                                                                                         |
| 154 | AGLMIERFVSLAAGF  | 4 | IERFVSLAA   | DRB1*04:02, DRB1*15:01, DRB1*15:02                                                                                                                                                                                                                         |
| 155 | GLMIERFVSLAAGFE  | 3 | IERFVSLAA   | DRB1*04:02, DRB1*15:01, DRB1*15:02, DRB1*16:02,                                                                                                                                                                                                            |
| 156 | LMIERFVSLAAGFEL  | 5 | FVSLAAGFE** | DRB1*04:05, DRB1*15:01, DRB1*15:02                                                                                                                                                                                                                         |
| 157 | MIERFVSLAAGFELE  | 4 | FVSLAAGFE** | DRB1*04:05, DRB1*09:01, DRB1*10:01                                                                                                                                                                                                                         |
| 158 | IERFVSLAAGFELED  | 3 | FVSLAAGFE** | DRB1*01:01, DRB1*04:03, DRB1*04:05, DRB1*04:06, DRB1*07:01, DRB1*08:03, DRB1*09:01, DRB1*10:01, DRB1*16:02                                                                                                                                                 |
| 159 | ERFVSLAAGFELEDF  | 2 | FVSLAAGFE** | DRB1*01:01, DRB1*04:05, DRB1*09:01, DRB1*10:01,                                                                                                                                                                                                            |
| 168 | FELEDFIPMAAGMAS  | 5 | FIPMAAGMA   | DRB1*01:01, DRB1*10:01, DRB1*11:01, DRB1*16:02,                                                                                                                                                                                                            |
| 169 | ELEDFIPMAAGMASL  | 4 | FIPMAAGMA   | DRB1*01:01, DRB1*04:01, DRB1*10:01, DRB1*11:01, DRB1*16:02                                                                                                                                                                                                 |
| 170 | LEDFIPMAAGMASLV  | 3 | FIPMAAGMA   | DRB1*01:01, DRB1*04:01, DRB1*10:01, DRB1*11:01, DRB1*16:02                                                                                                                                                                                                 |
| 171 | EDFIPMAAGMASLVL  | 2 | FIPMAAGMA   | DRB1*01:01, DRB1*10:01,                                                                                                                                                                                                                                    |
| 177 | AAGMASLVLARKAAG  | 6 | LVLARKAAG   | DRB1*11:01, DRB1*14:05,                                                                                                                                                                                                                                    |
| 178 | AGMASLVLARKAAGC  | 5 | LVLARKAAG   | DRB1*11:01, DRB1*14:05,                                                                                                                                                                                                                                    |
| 179 | GMASLVLARKAAGCQ  | 4 | LVLARKAAG   | DRB1*11:01, DRB1*14:01, DRB1*14:05, DRB1*14:54,                                                                                                                                                                                                            |
| 180 | MASLVLARKAAGCQY  | 3 | LVLARKAAG   | DRB1*11:01, DRB1*14:01, DRB1*14:05, DRB1*14:54,                                                                                                                                                                                                            |
| 181 | ASLVLARKAAGCQYL  | 2 | LVLARKAAG   | DRB1*11:01, DRB1*14:05,                                                                                                                                                                                                                                    |
| 190 | AGCQYLNTLTLAAGF  | 4 | YLNTLTLAA   | DRB1*04:01                                                                                                                                                                                                                                                 |
| 191 | GCQYLNTLTLAAGFS  | 3 | YLNTLTLAA   | DRB1*04:01                                                                                                                                                                                                                                                 |

\*HTL epitopes originally put in the vaccine construct

\*\*HTL epitopes with core peptides sequence homologous to human peptides. Peptide FVSLAAGFE contain residue that match with heptamer VSLAAGF from human protein hCG2019424 (sequence ID EAX10398.1). Peptide VVISSDGP contain residues that match with heptamer VVISSDG from guanine nucleotide binding protein (G protein) (sequence ID EAW53700.1).

**Table S8.** Non homology analysis of VC peptides against gut microbiota proteomes using PBIT server. All 43 of 9-mer CTL epitopes (left panel) and 17 of 9-mer core peptides of HTL epitopes (right panel) that were generated from VC were input into the PBIT server, which will calculate the similarity of peptide sequences with the sequences from the gut microbiomes.

| Non-homology analysis against gut microbiota proteomes                            |            |             |                          |
|-----------------------------------------------------------------------------------|------------|-------------|--------------------------|
| Number of input sequence/s:43                                                     |            |             |                          |
| Criteria for non-homologous proteins: E-value > 0.005 or % sequence identity < 50 |            |             |                          |
| <input type="checkbox"/>                                                          | Query name | No. of hits | BLAST report             |
| <input type="checkbox"/>                                                          | 1          | Undefined   | <a href="#">Download</a> |
| <input type="checkbox"/>                                                          | 2          | Undefined   | <a href="#">Download</a> |
| <input type="checkbox"/>                                                          | 3          | Undefined   | <a href="#">Download</a> |
| <input type="checkbox"/>                                                          | 4          | Undefined   | <a href="#">Download</a> |
| <input type="checkbox"/>                                                          | 5          | Undefined   | <a href="#">Download</a> |
| <input type="checkbox"/>                                                          | 6          | Undefined   | <a href="#">Download</a> |
| <input type="checkbox"/>                                                          | 7          | Undefined   | <a href="#">Download</a> |
| <input type="checkbox"/>                                                          | 8          | Undefined   | <a href="#">Download</a> |
| <input type="checkbox"/>                                                          | 9          | Undefined   | <a href="#">Download</a> |
| <input type="checkbox"/>                                                          | 10         | Undefined   | <a href="#">Download</a> |
| <input type="checkbox"/>                                                          | 11         | Undefined   | <a href="#">Download</a> |
| <input type="checkbox"/>                                                          | 12         | Undefined   | <a href="#">Download</a> |
| <input type="checkbox"/>                                                          | 13         | Undefined   | <a href="#">Download</a> |
| <input type="checkbox"/>                                                          | 14         | Undefined   | <a href="#">Download</a> |
| <input type="checkbox"/>                                                          | 15         | Undefined   | <a href="#">Download</a> |
| <input type="checkbox"/>                                                          | 16         | Undefined   | <a href="#">Download</a> |
| <input type="checkbox"/>                                                          | 17         | Undefined   | <a href="#">Download</a> |
| <input type="checkbox"/>                                                          | 18         | Undefined   | <a href="#">Download</a> |
| <input type="checkbox"/>                                                          | 19         | Undefined   | <a href="#">Download</a> |
| <input type="checkbox"/>                                                          | 20         | Undefined   | <a href="#">Download</a> |
| <input type="checkbox"/>                                                          | 21         | Undefined   | <a href="#">Download</a> |
| <input type="checkbox"/>                                                          | 22         | Undefined   | <a href="#">Download</a> |
| <input type="checkbox"/>                                                          | 23         | Undefined   | <a href="#">Download</a> |
| <input type="checkbox"/>                                                          | 24         | Undefined   | <a href="#">Download</a> |
| <input type="checkbox"/>                                                          | 25         | Undefined   | <a href="#">Download</a> |
| <input type="checkbox"/>                                                          | 26         | Undefined   | <a href="#">Download</a> |
| <input type="checkbox"/>                                                          | 27         | Undefined   | <a href="#">Download</a> |
| <input type="checkbox"/>                                                          | 28         | Undefined   | <a href="#">Download</a> |
| <input type="checkbox"/>                                                          | 29         | Undefined   | <a href="#">Download</a> |
| <input type="checkbox"/>                                                          | 30         | Undefined   | <a href="#">Download</a> |
| <input type="checkbox"/>                                                          | 31         | Undefined   | <a href="#">Download</a> |
| <input type="checkbox"/>                                                          | 32         | Undefined   | <a href="#">Download</a> |
| <input type="checkbox"/>                                                          | 33         | Undefined   | <a href="#">Download</a> |
| <input type="checkbox"/>                                                          | 34         | Undefined   | <a href="#">Download</a> |
| <input type="checkbox"/>                                                          | 35         | Undefined   | <a href="#">Download</a> |
| <input type="checkbox"/>                                                          | 36         | Undefined   | <a href="#">Download</a> |
| <input type="checkbox"/>                                                          | 37         | Undefined   | <a href="#">Download</a> |
| <input type="checkbox"/>                                                          | 38         | Undefined   | <a href="#">Download</a> |
| <input type="checkbox"/>                                                          | 39         | Undefined   | <a href="#">Download</a> |
| <input type="checkbox"/>                                                          | 40         | Undefined   | <a href="#">Download</a> |
| <input type="checkbox"/>                                                          | 41         | Undefined   | <a href="#">Download</a> |
| <input type="checkbox"/>                                                          | 42         | Undefined   | <a href="#">Download</a> |
| <input type="checkbox"/>                                                          | 43         | Undefined   | <a href="#">Download</a> |

43 of the 43 input sequences are non-homologous (highlighted in blue) based on input BLAST parameters.

| Non-homology analysis against gut microbiota proteomes                            |            |             |                          |
|-----------------------------------------------------------------------------------|------------|-------------|--------------------------|
| Number of input sequence/s:17                                                     |            |             |                          |
| Criteria for non-homologous proteins: E-value > 0.005 or % sequence identity < 50 |            |             |                          |
| <input type="checkbox"/>                                                          | Query name | No. of hits | BLAST report             |
| <input type="checkbox"/>                                                          | 1          | Undefined   | <a href="#">Download</a> |
| <input type="checkbox"/>                                                          | 2          | Undefined   | <a href="#">Download</a> |
| <input type="checkbox"/>                                                          | 3          | Undefined   | <a href="#">Download</a> |
| <input type="checkbox"/>                                                          | 4          | Undefined   | <a href="#">Download</a> |
| <input type="checkbox"/>                                                          | 5          | Undefined   | <a href="#">Download</a> |
| <input type="checkbox"/>                                                          | 6          | Undefined   | <a href="#">Download</a> |
| <input type="checkbox"/>                                                          | 7          | Undefined   | <a href="#">Download</a> |
| <input type="checkbox"/>                                                          | 8          | Undefined   | <a href="#">Download</a> |
| <input type="checkbox"/>                                                          | 9          | Undefined   | <a href="#">Download</a> |
| <input type="checkbox"/>                                                          | 10         | Undefined   | <a href="#">Download</a> |
| <input type="checkbox"/>                                                          | 11         | Undefined   | <a href="#">Download</a> |
| <input type="checkbox"/>                                                          | 12         | Undefined   | <a href="#">Download</a> |
| <input type="checkbox"/>                                                          | 13         | Undefined   | <a href="#">Download</a> |
| <input type="checkbox"/>                                                          | 14         | Undefined   | <a href="#">Download</a> |
| <input type="checkbox"/>                                                          | 15         | Undefined   | <a href="#">Download</a> |
| <input type="checkbox"/>                                                          | 16         | Undefined   | <a href="#">Download</a> |
| <input type="checkbox"/>                                                          | 17         | Undefined   | <a href="#">Download</a> |

17 of the 17 input sequences are non-homologous (highlighted in blue) based on input BLAST parameters.

**Table S9.** Summary of the Top 10 models generated by HDOCK for interaction between TLR4 and VC.

| Rank               | 1       | 2       | 3       | 4       | 5       | 6       | 7       | 8       | 9       | 10       |
|--------------------|---------|---------|---------|---------|---------|---------|---------|---------|---------|----------|
| Docking Score      | -283.87 | -247.70 | -247.20 | -246.91 | -246.37 | -242.17 | -240.76 | -239.35 | -239.05 | -238.82  |
| Ligand rmsd (Å)    | 50.26   | 45.64   | 51.23   | 53.39   | 34.65   | 44.80   | 43.67   | 56.62   | 44.74   | 29.67    |
| Interface residues | Model 1 | Model 2 | Model 3 | Model 4 | Model 5 | Model 6 | Model 7 | Model 8 | Model 9 | Model 10 |

**Table S10.** Receptor-ligand interface residues pair for Model 1.

| Receptor interface residue(s) | Ligand interface residue(s): | Receptor-ligand interface residue pair(s): |
|-------------------------------|------------------------------|--------------------------------------------|
| ASN 205A 2.788                | GLY 1A 2.593                 | 205A - 21A 2.788                           |
| HIS 229A 2.353                | ILE 2A 4.741                 | 229A - 20A 4.653                           |
| HIS 256A 3.052                | ILE 3A 3.178                 | 229A - 21A 2.353                           |
| GLU 286A 3.344                | THR 5A 3.357                 | 256A - 21A 4.576                           |
| GLU 287A 2.934                | GLN 7A 2.599                 | 256A - 38A 3.052                           |
| ASN 309A 3.135                | LYS 8A 1.779                 | 286A - 35A 4.823                           |
| VAL 310A 4.100                | TYR 9A 2.827                 | 286A - 36A 3.344                           |
| SER 311A 3.307                | TYR 10A 3.110                | 287A - 35A 3.486                           |
| GLN 333A 2.498                | ARG 17A 3.329                | 287A - 38A 2.934                           |
| HIS 334A 3.489                | VAL 20A 4.653                | 309A - 36A 3.135                           |
| LYS 354A 4.414                | LEU 21A 2.353                | 310A - 36A 4.100                           |
| ARG 355A 2.827                | SER 34A 2.498                | 311A - 34A 4.045                           |
| GLU 376A 1.779                | THR 35A 3.486                | 311A - 35A 4.339                           |
| PHE 377A 2.840                | ARG 36A 3.135                | 311A - 36A 3.307                           |
| LYS 402A 3.318                | ARG 38A 2.934                | 333A - 34A 2.498                           |
| TYR 403A 3.591                |                              | 333A - 35A 4.826                           |
| GLU 425A 2.599                |                              | 333A - 36A 3.871                           |
| HIS 426A 3.445                |                              | 334A - 34A 3.489                           |
| ILE 450A 4.142                |                              | 354A - 9A 4.414                            |
| TYR 451A 2.593                |                              | 355A - 9A 2.827                            |
| VAL 475A 4.057                |                              | 355A - 10A 3.584                           |
| LYS 477A 3.743                |                              | 355A - 17A 3.329                           |
| PHE 500A 4.404                |                              | 355A - 34A 4.369                           |
|                               |                              | 376A - 8A 1.779                            |
|                               |                              | 376A - 9A 2.931                            |
|                               |                              | 377A - 9A 2.840                            |
|                               |                              | 377A - 10A 3.110                           |
|                               |                              | 377A - 17A 4.836                           |
|                               |                              | 402A - 7A 3.318                            |
|                               |                              | 402A - 8A 4.316                            |
|                               |                              | 402A - 9A 3.657                            |
|                               |                              | 403A - 9A 3.908                            |
|                               |                              | 403A - 10A 3.591                           |
|                               |                              | 425A - 5A 3.357                            |
|                               |                              | 425A - 7A 2.599                            |
|                               |                              | 426A - 3A 3.445                            |
|                               |                              | 426A - 5A 4.930                            |
|                               |                              | 450A - 3A 4.142                            |
|                               |                              | 450A - 5A 4.837                            |
|                               |                              | 451A - 1A 2.593                            |
|                               |                              | 451A - 2A 4.741                            |
|                               |                              | 451A - 3A 3.178                            |
|                               |                              | 475A - 1A 4.554                            |
|                               |                              | 475A - 3A 4.057                            |
|                               |                              | 477A - 1A 3.743                            |
|                               |                              | 477A - 2A 4.797                            |
|                               |                              | 500A - 1A 4.404                            |
